# Dynamics of gene expression and chromatin marking during cell state transition

Beatrice Borsari<sup>1</sup>, Amaya Abad<sup>1</sup>, Cecilia C. Klein<sup>1,2,3</sup>, Ramil Nurtdinov<sup>1</sup>, Alexandre Esteban<sup>1,4</sup>, Emilio Palumbo<sup>1</sup>, Marina Ruiz-Romero<sup>1</sup>, María Sanz<sup>1,5</sup>, Bruna R. Correa<sup>1</sup>, Rory Johnson<sup>1,6</sup>, Sílvia Pérez-Lluch<sup>1,\*</sup> and Roderic Guigó<sup>1,7,8,\*</sup>

<sup>1</sup>Centre for Genomic Regulation (CRG), The Barcelona Institute of Science and Technology, Barcelona 08003, Catalonia, Spain

<sup>2</sup>Departament de Genètica, Microbiologia i Estadística, Facultat de Biologia and Institut de Biomedicina (IBUB), Universitat de Barcelona, Barcelona 08028, Catalonia, Spain

<sup>3</sup>Present address: Clarivate, Barcelona 08025, Catalonia, Spain

<sup>4</sup>Present address: “la Caixa” Foundation, Department of Research and Innovation, Barcelona 08028, Catalonia, Spain

<sup>5</sup>Present address: Universidad Camilo José Cela (UCJC), Madrid 28692, Spain

<sup>6</sup>Present address: Department of Medical Oncology, Inselspital, University Hospital and University of Bern, Bern 3010, Switzerland. School of Biology & Environmental Science, University College Dublin (UCD), Dublin 4, Ireland.

<sup>7</sup>Universitat Pompeu Fabra (UPF), Barcelona 08003, Catalonia, Spain

<sup>8</sup>Lead Contact

\*Correspondence: [silvia.perez@crg.cat](mailto:silvia.perez@crg.cat) (S.P-L.), [roderic.guigo@crg.cat](mailto:roderic.guigo@crg.cat) (R.G.)

## 1 **Summary**

2 We have monitored the transcriptomic and epigenomic status of cells at twelve time-points during the  
3 transdifferentiation of human pre-B cells into macrophages. Using this data, we have investigated some  
4 fundamental questions regarding the role of chromatin in gene expression. We have found that, over time,  
5 genes are characterized by a limited number of chromatin states (combinations of histone modifications),  
6 and that, consistently, chromatin changes over genes tend to occur in a coordinated manner. We have  
7 observed strong association between these changes and gene expression only at the time of initial gene  
8 activation. Activation is preceded by H3K4me1 and H3K4me2, and followed in a precise order by most  
9 other histone modifications. Further changes in gene expression, comparable or even stronger than those  
10 at initial activation, occur without associated changes in histone modifications. The data generated here  
11 constitutes, thus, a unique resource to investigate transcriptomic and epigenomic dynamics during a differ-  
12 entiation process.

## 13 **Keywords**

14 histone modifications, transcription, gene expression regulation, transdifferentiation, pre-B cell, macrophage,  
15 time-series, ChIP-seq, RNA-seq

## 16 Introduction

17 Chromatin is the complex of DNA, histone and non-histone proteins that constitutes the chromosomes  
18 found in the nucleus of eukaryotic cells. Post-translational modifications (PTMs) of histone proteins, to-  
19 gether with other epigenetic features, can alter the overall chromatin structure and are thought to play a  
20 critical role in the regulation of all DNA-based processes. In particular, interest has grown in understanding  
21 the relationship between chromatin and transcriptional regulation.

22 Several histone marks have been associated with either active or silent gene expression. For instance,  
23 high levels of H3K27ac and H3K4me1 are considered a feature of active transcriptional enhancers (Hon  
24 et al., 2009), whereas active promoters are typically marked by H3K4me3 (Barski et al., 2007; Schneider  
25 et al., 2004). Conversely, features of constitutive and facultative heterochromatin correlate with levels of  
26 H3K9me3 and H3K27me3, respectively (Trojer and Reinberg, 2007; Hansen et al., 2008). This is strongly  
27 suggestive of an association between gene expression and chromatin modifications. According to the his-  
28 tone code hypothesis (Strahl and Allis, 2000), distinct combinations of histone modifications over regulatory  
29 regions — associated with specific arrangement of transcription factors — confer to each gene a unique  
30 temporal and spatial transcriptional program. Based on this hypothesis, methods to predict gene expres-  
31 sion from combinations of different histone marks have been developed with great accuracy, even when  
32 the predictions are obtained in a cell type other than the one in which the model is inferred (Karlič et al.,  
33 2010; Dong et al., 2012).

34 The majority of these predictions are conducted in steady-state conditions, and therefore do not track  
35 the association between gene expression and histone marks over time. Studies along time, however, are  
36 essential to decipher the mechanisms behind transcriptional control and maintenance, since an appropriate  
37 balance of stability and dynamics in epigenetic features seems to be required for accurate gene expression  
38 (Greer and Shi, 2012). Interestingly, a number of studies in different species and biological models have  
39 highlighted a degree of correlation between gene expression and chromatin marks over time substantially  
40 lower than what previously described in steady-state conditions. For instance, during fruit fly development,  
41 around 34% of the expressed genes lack H3K4me3 at their promoters (Nègre et al., 2011), while transcrip-  
42 tion can occur in the absence of most active marks (Hödl and Basler, 2012; Pérez-Lluch et al., 2015). It  
43 has also been reported that, upon stimulation, changes in gene expression are not always accompanied  
44 by changes in histone modifications (Vandenbon et al., 2018), and that chromatin marks do not represent  
45 linear measures of transcriptional activity (Le Martelot et al., 2012; Wang et al., 2019). Overall, it has  
46 been suggested that the contribution of chromatin to gene expression depends largely on the promoter  
47 architecture of genes (Rach et al., 2011).

48 Time-series studies have also striven to elucidate the temporal ordering in which transcription factor  
49 (TF) binding, deposition of histone marks and RNA Polymerase recruitment occur at both enhancer and  
50 promoter regions. For instance, it has been reported that enhancers required for hematopoietic differentia-  
51 tion are already primed with H3K4me1 in multipotent progenitors (Mercer et al., 2011). However, *de novo*  
52 enhancers' transcription seems to precede local deposition of H3K4me1 and H3K4me2 marks (Kaikkonen

53 et al., 2013). Furthermore, deposition of H3K4me1 is dispensable for either enhancer or promoter tran-  
54 scription, and does not affect the maintenance of transcriptional programs (Dorigi et al., 2017; Cao et al.,  
55 2018).

56 Nevertheless, most time-series studies so far have monitored a few histone modifications in a limited  
57 number of time-points. To address these limitations, here we have generated gene expression profiles and  
58 maps of nine histone modifications at twelve time-points along a controlled cellular differentiation process:  
59 the induced transdifferentiation of human BLaER1 cells into macrophages (Rapino et al., 2013). BLaER1  
60 is a human B-cell precursor leukemia cell line, stably transfected with a construct containing cEBP $\alpha$  fused  
61 with the estrogen hormone receptor binding domain (Rapino et al., 2013). These cells are able to transd-  
62 ifferentiate into functional macrophages at a high efficiency rate upon induction with beta-estradiol, which  
63 induces the internalization of the transcription factor into the nucleus, promoting massive transcriptomic  
64 changes. We believe that the data that we have generated constitutes an unprecedented resource in the  
65 field of time-series transcriptional and chromatin studies.

66 Analysis of these data reveals that the large steady-state associations between gene expression and  
67 chromatin marking previously reported are partially artifactual, and mainly arise from the constrained na-  
68 ture of the transcriptome and the epigenome. We found that only a limited number of combinations of  
69 histone modifications are actually marking the genes, defining the major genic chromatin states in the hu-  
70 man genome. Genes tend to remain in the same state throughout the entire transdifferentiation process,  
71 even those that change expression substantially. We have also observed substantial chromatin changes  
72 that are not necessarily accompanied by changes in gene expression, suggesting that epigenetic modifica-  
73 tions contribute to cell state in a manner that cannot be fully recapitulated by gene expression. We did find,  
74 however, a strong association between chromatin marking and expression at the time of initial gene activa-  
75 tion. We have been able to determine the precise order of histone modifications at that time, and found that  
76 only H3K4me1 and H3K4me2 appear to be deposited prior to gene activation. Further changes in gene  
77 expression, comparable or even stronger than those at gene activation, seem to be mostly uncoupled from  
78 changes in histone modifications.

## 79 **Results**

### 80 **A rich resource for time-series analysis of chromatin and gene expression dynamics**

81 To investigate the temporal interplay between transcriptional activity and chromatin marking during the  
82 transdifferentiation of BLaER1 cells into macrophages (Rapino et al., 2013), we monitored this process  
83 at 12 time-points, from 0 to 168 hours post-induction (p.i.) (Fig. 1a). Reciprocal regulation of B-cell  
84 and macrophage antigens CD19 and Mac-1, respectively, was assessed by flow cytometry throughout  
85 the process (Fig. S1a). For each time-point we characterized, in two biological replicates, the whole  
86 cell RNA-seq gene expression profiles and the ChIP-seq maps of nine histone post-translational modifi-  
87 cations. Besides the six marks (H3K4me1, H3K4me3, H3K27ac, H3K27me3, H3K36me3 and H3K9me3)

88 endorsed by the reference epigenome criteria (International Human Epigenome Consortium, [http://](http://ihec-epigenomes.org/research/reference-epigenome-standards/)  
89 [ihec-epigenomes.org/research/reference-epigenome-standards/](http://ihec-epigenomes.org/research/reference-epigenome-standards/)), we have profiled H3K4me2,  
90 H3K9ac and H4K20me1 (Fig. 1b). This has allowed us to characterize the interchange between different  
91 degrees of lysine four methylation over time, but also to compare acetylation patterns on distinct lysine  
92 residues, and to explore the alternation of broad marks over actively transcribed gene bodies. In addition,  
93 we have generated, for each time-point, ChIP-seq profiles of the transcription factor cEBP $\alpha$ , RNA-seq data  
94 from the cytosol and the nucleus, as well as riboprofiling and proteomics maps (Correa *et al.*, in prepara-  
95 tion).

96 To avoid any bias due to differences in the transdifferentiation process between experiments, a crucial  
97 component of our experimental design is that the RNA and the chromatin to perform immunoprecipitations  
98 with all histone marks were obtained from the same pool of cells in each biological replicate (see Meth-  
99 ods). To efficiently and reproducibly analyze the wealth of data generated in a controlled environment, we  
100 developed *ChIP-nf* (<https://github.com/guigolab/chip-nf>), a pipeline implemented in NextFlow  
101 (DI Tommaso *et al.*, 2017, see Methods).

## 102 **Gene expression recapitulates transdifferentiation more accurately than chromatin**

103 To characterize gene expression and histone modifications' profiles during the pre-B cell transdifferenti-  
104 ation process, we selected 12,248 genes — out of 19,831 protein-coding genes annotated in Gencode  
105 (Frankish *et al.*, 2019) version 24 — that were either expressed in at least one time-point ( $\geq 5$  TPM, 10,696  
106 genes), or silent all along the process (0 TPM in all time-points, 1,552 genes) (Fig. S1b). Within expressed  
107 genes, we identified 8,030 genes characterized by significant changes in their expression profiles over time  
108 (differentially expressed, DE; Fig. S1b; see Methods). Half of these genes are down-regulated during the  
109 process, 25% are up-regulated, and for the remaining 25% we observed transient increases (peaking) and  
110 decreases (bending) in expression. 2,666 expressed genes do not display changes in expression over time  
111 (stably expressed).

112 For every gene in these sets, we also computed the level of each histone modification at a specific time-  
113 point, either over the gene body in the case of H3K36me3 and H4K20me1, or at promoter regions ( $\pm 2$  Kb  
114 with respect to the transcription start site) for the remaining marks (Fig. S1c, see Methods). Roughly all  
115 expressed genes are marked by the canonical active histone modifications, whereas the proportion of silent  
116 genes showing peaks of these marks is low, except for H3K4me1 and H3K4me2 (Table S1). Unexpectedly,  
117 marks typically associated with silent transcription (H3K9me3 and H3K27me3) are not abundant in either  
118 expressed or silent genes.

119 To visually summarize the gene expression and individual histone modification profiles during transd-  
120 ifferentiation, we performed Principal Component Analysis (PCA), in which we plotted the 12 time-points  
121 based on these profiles (Fig. 1c). Even though the PCA was performed jointly on gene expression and  
122 all chromatin marks — which show different patterns of variation —, the first two principal components  
123 (PC1 and PC2) still capture about one fifth of the total variance of the data. Whereas gene expression is

124 able to recapitulate the process in the space of the first two principal components, the chromatin marks  
125 are less resolute, with H3K27ac, H3K9ac and H4K20me1 showing the clearest trends. The trajectory of  
126 gene expression in the PCA space suggests that the process occurs in two different transcriptional phases,  
127 with PC1 explaining the main differences between pre-B cells and macrophages, and PC2 representing  
128 early transcriptional changes within the first 24 hours of transdifferentiation. Instead, for several chromatin  
129 marks we observed parabolic trajectories, with PC2 mainly separating the intermediate stages of transdif-  
130 ferentiation from the differentiated cell types. Genes contributing to PC1 are mostly up- or down-regulated  
131 (Fig. S1d), and display significant enrichment in Gene Ontology terms associated with immune response  
132 and cell motility (Table S2). Instead, PC2-contributing genes perform functions related to nucleic acids  
133 metabolism and protein modification (Table S2), and comprise a large proportion of genes either displaying  
134 no changes in gene expression, or presenting transient increases or decreases (Fig. S1d). Taken all to-  
135 gether, these results suggest that while there are major changes in gene expression and chromatin leading  
136 from one differentiated cell type to another (PC1), there are also changes that may be involved in a transient  
137 de-differentiation from pre-B cells into an intermediate state, and in the re-differentiation into macrophages  
138 (PC2), with a distinct contribution of expression and chromatin marks.

### 139 **The association between chromatin marking and gene expression is overestimated by cor-** 140 **relations computed in steady-state conditions**

141 We computed, at each time-point, the steady-state correlation between levels of expression and histone  
142 modifications across the set of 12,248 genes (Fig. 1d). As previously observed, we found a strong positive  
143 correlation for most active marks (median Pearson  $r$  value across time-points between 0.51 and 0.72),  
144 and a (weak) negative correlation for the repressive marks H3K9me3 and H3K27me3 (-0.07 and -0.17,  
145 respectively). However, when computing, for individual genes, the correlation between expression and  
146 chromatin profiles through time (time-course correlations), the values are substantially lower for active  
147 marks (median Pearson  $r$  ranging between 0.10 and 0.45), and higher for repressive marks (0.13 and  
148 -0.03 for H3K9me3 and H3K27me3, respectively; Fig. 1d). Remarkably, for H3K9me3 the time-course  
149 correlation with expression is positive, in contrast to what has been previously described (Ninova et al.,  
150 2019), and that we also measured in steady states.

151 It appears, therefore, that correlations measured in steady-state conditions artificially inflate the true  
152 degree of association between gene expression and chromatin modifications. This can be dramatically  
153 seen by randomizing the real temporal association between gene expression and chromatin marks. Within  
154 each gene's time-series profile, we permuted histone modification levels among time-points, while keeping  
155 the actual gene expression values (see Methods; for an example with H3K4me3, compare upper and  
156 lower panels in Fig. S2a). As expected, the average time-course correlation is zero for all marks (Fig.  
157 S2b). However, the steady-state correlations are unexpectedly large for canonically active marks upon  
158 randomization, despite the fact that any meaningful association between gene expression and chromatin  
159 marks has been eliminated (Figs. S2a lower panel, S2b). This is likely due to a considerable fraction

160 of genes displaying stable expression and chromatin profiles over time, which are either relatively highly  
161 expressed and marked (housekeeping genes, Pervouchine et al., 2015), or silent and not marked. Indeed,  
162 after removing the genes with silent or stable expression profiles over time, the steady-state correlations  
163 (Fig. S2c) are lower compared to those computed on the entire set of genes (Fig. 1d), and become more  
164 similar to the time-course correlations.

## 165 **Genes are characterized by a limited number of major chromatin states, which are more** 166 **stable than expression**

167 Next, we investigated the dynamics of chromatin marking during transdifferentiation. Towards that end, we  
168 summarized the chromatin state of each gene at each time-point, by building a multivariate Hidden Markov  
169 Model (HMM) on the signal of the nine histone marks along the twelve transdifferentiation points. More  
170 specifically, we produced a segmentation of the transdifferentiation time by assigning a given chromatin  
171 state to each gene at each time-point. This is in contrast to previous uses of HMMs in the field, where  
172 the segmentation is produced along the genome sequence by assigning a given chromatin state to every  
173 genome interval (Ernst and Kellis, 2012; Hoffman et al., 2012; Song and Chen, 2015; Zhang et al., 2016;  
174 Zhang and Hardison, 2017). We explored configurations with up to twenty different states, and found that  
175 five states are a good compromise between optimizing the likelihood of the model and the number of states  
176 capturing the epigenetic status of genes (Figs. S3a and 2a, see Methods). These five states correspond  
177 to the major combinations of histone modifications in which genes can be found (major chromatin states):  
178 a) absence of marking (with the exception, in some cases, of moderate marking by H3K9me3), b) low  
179 marking (mono and di-methylation of H3K4), c) bivalent marking (mostly marking by H3K4me1, H3K4me2  
180 and/or H3K27me3), d) canonical active marking (all canonical active marks) and e) strong canonical active  
181 marking in the presence of H3K9me3 signal. These states (from a to e) correspond to increasing marking  
182 by canonically active histone modifications, with the exception of the bivalent marking state (c), which is also  
183 characterized by high H3K27me3 signal. These results suggest that only a limited number of combinations  
184 of marks can co-occur in a given gene at a given time-point. They also suggest that marking by H3K4me1  
185 and H3K4me2 appears to be a precondition for marking by any other active histone modification, since for  
186 none of the configurations that we have explored, we have found states in which there is marking by an  
187 active histone modification without H3K4me1 and H3K4me2. The most frequent states among expressed  
188 genes are active and strong active marking (d and e, respectively), while the most frequent state among  
189 silent genes is absence of marking (a) (Fig. S3b).

190 Hierarchical clustering of genes based on the sequence of the five states along the twelve time-points  
191 revealed a limited number of temporal chromatin state profiles (Fig. 2b-c). Most of the genes remain in the  
192 same chromatin state during transdifferentiation (constant state profiles), irrespective of whether they are  
193 stably (79%) or differentially expressed (70%) during transdifferentiation (Fig. 2d, left panels). Thus, during  
194 the process, most changes in gene expression are not accompanied by chromatin changes.

195 Of the remaining genes, the vast majority (90%) go over just one-state transition during transdifferenti-

196 ation. When considering DE genes, these transitions are generally associated with the expected transcrip-  
197 tional changes (Fig. 2c). Transitions from weaker to stronger active chromatin marking are accompanied by  
198 increases in gene expression (Fig. 2c, upper side; Fig. 2d, middle panels), while transitions from stronger to  
199 weaker active chromatin states are accompanied by decreases in gene expression (Fig. 2c, lower side; Fig.  
200 2d, right panels). However, while transitions from active to strong active marking states (and vice versa)  
201 are more numerous, the corresponding fold changes in gene expression are lower, compared to transitions  
202 from low marking to active marking states (and vice versa). We observed activating transitions from the  
203 absent state mainly to the low marking state, further supporting the fact that marking by H3K4me1 and  
204 H3K4me2 is a prerequisite for the deposition of any other active histone modifications. On the other hand,  
205 we did not observe transitions from the strong active marking state to absence of marking, suggesting that  
206 the erasing of chromatin marks is not as an efficient process as its deposition.

207 Analysis of individual histone marks confirmed the HMM results. We determined whether the marks'  
208 signals are stable or variable over time, analogously to what was done for gene expression profiles. The  
209 majority of genes present, indeed, stable chromatin profiles during transdifferentiation, even when focusing  
210 only on the differentially expressed ones (Table S3, left side; Fig. 3a). Lysine acetylation (H3K27ac and  
211 H3K9ac) is the most dynamic signal (Table S3, left side). Still, around 35% of DE genes show no changes  
212 in histone acetylation, despite being marked. Unexpectedly, only 8.5% of DE genes show changes in  
213 H3K27me3 throughout the process, although roughly half of them are down-regulated. Conversely, for a  
214 smaller number of silent and stably expressed genes we observed significant variations in their chromatin  
215 profiles over time (Table S4, Figs. 3b-c), comparable or even larger than for DE genes (Fig. S3c), although  
216 no changes could be detected in their expression profiles. We observed, in general, that differentially  
217 marked genes display clearer transdifferentiation trajectories compared to genes that are stably marked  
218 (Fig. S3d), further supporting that the contribution of gene expression and chromatin marks to cell state is  
219 not fully overlapping.

## 220 **Chromatin marking is associated with expression specifically at the time of gene activation**

221 The limited number of chromatin HMM states indicates a coordinated behaviour of histone modifications.  
222 To investigate this behaviour at the resolution of individual marks and how it relates to gene expression,  
223 we first determined the type of association between each mark and expression along transdifferentiation,  
224 for each of the 8,030 genes that are differentially expressed (labels: unmarked, stably marked, positively  
225 correlated, uncorrelated and negatively correlated; see Fig. 4a, Table S3 and Methods). Then, we clustered  
226 the combinations of marks and types of association, and found that, in general, in a given gene, most marks  
227 show indeed the same type of association with expression (Fig. 4b). When clustering the genes based on  
228 these combinations, we found essentially three major groups (Figs. 4c, S4a). The first and largest cluster  
229 includes 4,995 DE genes (62%), presenting either stable or uncorrelated profiles for the majority of active  
230 marks, and absence of marking for H3K27me3 and H3K9me3 (Figs. 5a-b, upper panels). The second  
231 cluster includes 2,993 DE genes (37%), showing the canonical positive correlation between expression



232 and most active modifications. A large proportion of these genes lack repressive marks, but a few of them  
233 (9%) exhibit the expected negative correlation with H3K27me3 (Figs. 5a-b, middle panels). Finally, the  
234 third and smallest cluster includes 102 genes (1%) characterized by an overall absence of both active and  
235 repressive marking, with the exception of H3K4me1 and H3K4me2 (Figs. 5a-b, lower panels).

236 Especially in the case of up-regulated genes, these clusters mostly reflect the level of gene activation  
237 when transdifferentiation starts (Figs. 5c, S4b-c). Genes in cluster 1 are already activated at the beginning  
238 of transdifferentiation, genes in cluster 2 are in early stages of activation or are activated early during  
239 transdifferentiation, while genes in cluster 3 are activated late during the process. The functions of the  
240 genes in these clusters are consistent with their level of activation at the beginning of transdifferentiation  
241 (Figs. S4d-e). In particular, genes in cluster 3 are associated with macrophage-specific functions, and we  
242 have found them lowly expressed and lowly marked in other cell types but CD14+ monocytes (Figs. S4f-g).  
243 Down-regulation of gene expression, on the other hand, appears to be largely uncoupled from chromatin  
244 changes, since most genes decreasing expression belong to cluster 1 (Fig. S4h).

## 245 **Gene expression changes anticipate changes in most active marks for up-regulated genes**

246 The results above are suggestive that the association between gene expression and histone modifications  
247 occurs preferentially in a limited window of time during the initial stage of gene activation. Thus, to inves-  
248 tigate the relationship between expression and chromatin marking precisely at this stage, we focused on  
249 the set of 257 up-regulated genes that are not expressed at 0 hours p.i., and that are, therefore, specifically  
250 activated during transdifferentiation. The vast majority of these genes (230, 89%) belong to cluster 2, that  
251 is, they are indeed characterized by positive correlation between gene expression and active chromatin  
252 marks. They are mostly associated with low and bivalent marking HMM states and, in 25% of the cases,  
253 transition into stronger marking states towards the end of transdifferentiation (Fig. S5a, upper panel).

254 To investigate the temporal relationship between gene activation and chromatin marking, for each up-  
255 regulated gene and histone mark we rescaled the expression and chromatin time-series profiles to the  
256 same range (0-100%), and identified the first time-point at which the expression level and the chromatin  
257 signal reach at least 25%, 50%, 75% and 100% (Fig. S5b). In this way, we determined whether active  
258 chromatin marking anticipates, co-occurs with, or follows gene expression. In contrast to the prevalent view,  
259 we did not find that most active marks anticipate activation of gene expression. At the first stage of up-  
260 regulation (25%), only marking by H3K4me1, H3K4me2 and H3K27ac anticipates more often than follows  
261 activation of gene expression (Figs. 6a-b), whereas for the other marks most changes follow expression  
262 up-regulation. These differences are progressively lost towards the end of the process (Figs. 6a, S5c).

263 To further decipher the precise order in which active chromatin signals are established over time, we  
264 computed, for a given mark, the fraction of genes whose changes either anticipate (Fig. 6c, upper panel)  
265 or co-occur with (Fig. S5d, upper panel) changes in each of the other six marks. When considering 25% of  
266 up-regulation, we observed that, in general, no marks anticipate H3K4me1, indicating that it is the first mark  
267 to increase, followed by H3K4me2 and H3K27ac (Fig. 6c, upper panel). This is consistent with the HMM

268 analysis, which suggested that marking by H3K4me1 and H3K4me2 is a prerequisite for marking by other  
269 histone modifications (Fig. 2a). Changes in H3K4me1, H3K4me2 and H3K27ac most frequently precede  
270 increases in H3K9ac and H3K4me3. In all the comparisons, H3K36me3 and H4K20me1 follow the other  
271 marks (Fig. 6c, upper panel). As observed for gene expression, this precise order of marks' deposition is  
272 progressively lost along transdifferentiation (Figs. 6c upper panel, S5d upper panel). Overall, this suggests  
273 that the deposition of active chromatin modifications follows a precise order at the time of initial gene  
274 activation (H3K4me1 > H3K4me2 > H3K27ac > expression > H3K9ac > H3K4me3 > H3K36me3 >  
275 H4K20me1; Fig. 6d left panel).

276 We performed a similar analysis with the set of 629 up-regulated genes that are already substantially  
277 expressed at 0 hours p.i. (> 25 TPM). These genes belong mostly to cluster 1 (389, 62%), that is, their  
278 expression profiles are uncoupled from changes in chromatin marking, and they actually remain in active  
279 chromatin states during transdifferentiation (Fig. S5a lower panel). For these genes we did not find preser-  
280 vation in the pattern of chromatin deposition with respect to expression (Fig. S5e), nor in the deposition of  
281 the marks (Figs. 6c lower panel; Fig. 6d right panel; S5d lower panel).

## 282 **A model to explain the coupling between transcription and chromatin marking over time**

283 Altogether, our results show that the canonical association between histone modifications and gene ex-  
284 pression mainly occurs in a limited window of time preceding and following initial gene activation. We  
285 specifically propose a model (Fig. 7a) in which the activation of gene expression is anticipated by de-  
286 position of H3K4me1, H3K4me2 and, less frequently, of H3K27ac at promoter regions. The deposition of  
287 other marks typically enriched either at promoters (H3K9ac, H3K4me3) or over the gene body (H3K36me3,  
288 H4K20me1) is concomitant to or, more often, follows (and may be induced by) gene activation. After this  
289 initial stage of gene activation, further changes in gene expression, comparable or even stronger, appear  
290 to be mostly uncoupled from changes in histone modifications (Fig. 7b, compare left and right panels).

291 This model explains our observations well. The patterns of association between chromatin marking and  
292 gene expression (as defined in Fig. 4a) for genes in different degrees of activation when transdifferentiation  
293 starts (0h p.i.) reflect how this association changes as gene activation proceeds (Fig. 7c). Up-regulated  
294 genes that are silent when transdifferentiation starts (mostly in cluster 3) lack almost all "activating" histone  
295 modifications, possibly with the exception of H3K4me1 and H3K4me2 (i.). Up-regulated genes in cluster 2  
296 that are lowly or not activated at 0h show mostly correlated patterns of expression and chromatin marking.  
297 In these genes, most marks, with the exception of H3K4me1, H3K4me2 and H3K27ac, follow rather than  
298 anticipate expression (ii., see also Fig. 7b, left panel). As we consider genes with increasing degrees  
299 of activation at 0h (and thus, in increasingly advanced states of activation), the fraction of genes with  
300 correlated patterns of expression and chromatin marking decreases, while the fraction of genes with stable  
301 or uncorrelated chromatin profiles (iii. and iv.) proportionally increases. The temporal order of activation of  
302 marks observed in early activation stages is also gradually lost. Finally, for genes in cluster 1 (v.), which  
303 are already highly active when transdifferentiation starts, changes in gene expression, even if substantial,

304 are mostly uncoupled from chromatin marking, showing uncorrelated or stable profiles (see also Fig. 7b,  
305 right panel).

## 306 Discussion

307 Epigenetics was initially defined as “the branch of biology that studies the causal interactions between  
308 genes and their products which bring the phenotype into being” (Waddington, 1942). In a more contempo-  
309 rary definition, “an epigenetic trait is a stably heritable phenotype resulting from changes in a chromosome  
310 without alterations in the DNA sequence” (Berger et al., 2009). The epigenetic mechanisms leading to  
311 the development of an individual or to the differentiation of a cell lineage from the unique genotype of the  
312 organism have been largely studied during decades. Although initial references to the mechanisms by  
313 which epigenetics promotes cell memory and leads cell fate did not relate to its ability to regulate gene  
314 expression, a causative role for epigenetic modifications in controlling transcription has been later pointed  
315 out (see Bannister and Kouzarides, 2011, and Rivera and Ren, 2013, for reviews about different aspects  
316 related to epigenetics and its role in regulating gene expression), and it has even been shown that some  
317 epigenetic features, such as histone modifications, are accurate predictors of gene expression (Karličić et al.,  
318 2010; Dong et al., 2012; Sekhon et al., 2018) and the other way around (Yin et al., 2019).

319 However, the causal/consequential relationship between chromatin modifications and gene expression  
320 represents a long-standing discussion (Henikoff and Shilatifard, 2011), and a number of reports have chal-  
321 lenged the causal role that has been broadly attributed to chromatin modifications (Dorigi et al., 2017;  
322 Rickels et al., 2017; Krogan et al., 2003; Hödl and Basler, 2012). Still, and despite the efforts dedicated  
323 to this problem and the vast literature produced, the actual relationship between histone modifications and  
324 the regulation of gene expression remains unsolved.

325 This is partially due to the few available studies in which gene expression and histone modifications  
326 have been both consistently monitored through time in a given dynamic system. Differentiation models  
327 are suitable to study the relationship between gene expression and chromatin marking, as they provide a  
328 dynamic system that allows to decipher the order of the events. In this work, we have used the transdif-  
329 ferentiation of BLaER1 cells (pre-B cells) into macrophages, a model that has proven to be highly efficient  
330 (Rapino et al., 2013), and we have generated high-quality data on the transcriptome and the epigenome in  
331 twelve time-points along the seven days the transdifferentiation process lasts. Our analysis of these data  
332 has uncovered some fundamental features of chromatin organization in human genes and of the relation-  
333 ship between gene expression and histone modifications.

334 Our analyses have also contributed to a better understanding of the molecular events underlying trans-  
335 differentiation of pre-B cells into macrophages. Despite the fact that, to our knowledge, there is no retro-  
336 differentiation during the process (Di Tullio et al., 2011; Rapino et al., 2013), the joint PCA of gene ex-  
337 pression and chromatin marks suggests that BLaER1 cells undergo an intermediate state (Fig. 1c). This  
338 intermediate state is characterized by chromatin changes not accompanied by changes in gene expres-

339 sion (Fig. S6), and vice versa by changes in gene expression not associated with chromatin changes (Fig.  
340 S6a). Although it is often assumed that the transcriptome is the main determinant of cell state, these results  
341 suggest that epigenetic modifications contribute to cell state in a manner that cannot be fully recapitulated by  
342 gene expression. Thus, neither the epigenome nor the transcriptome can be fully predictive of one another.

343 Consistently, we found that the association between gene expression and chromatin modifications is  
344 overall weaker than reflected by the correlations reported so far, which have been mostly computed in a  
345 particular steady-state cellular condition (Fig. 1d). These artifactually strong correlations result from the  
346 largely constrained nature of the human epigenome and transcriptome. In particular, a large fraction of  
347 genes in the human genome (likely more than 50%, Pervouchine et al., 2015) are either invariably silent  
348 and not marked, or expressed and marked across most cellular states. Genes with stable epigenomes  
349 and transcriptomes drive the correlations to large values when computed in a particular cell condition,  
350 and explain why models relating gene expression to histone modifications inferred in a particular cell type  
351 have high predictive power in other cell types (Karlić et al., 2010; Dong et al., 2012; Sekhon et al., 2018;  
352 Yin et al., 2019), even though there is no true causality involved in the relationship between chromatin  
353 and expression. The steady-state correlations represent an example of the Simpson's paradox (Simpson,  
354 1951), by which the data can show different or even opposite behavior if subgroups within the dataset are  
355 considered.

356 HMMs have been widely used to summarize patterns of combinations of multiple histone modifications  
357 into a limited number of chromatin states. However, in most cases so far, they have been used to segment  
358 the genome sequence (Ernst and Kellis, 2012; Hoffman et al., 2012; Song and Chen, 2015; Zhang et al.,  
359 2016; Zhang and Hardison, 2017). Here, instead, we used them, we believe for the first time, to segment  
360 time along a dynamic differentiation process. The HMM segmentation reveals that, even though the num-  
361 ber of possible histone combinations is very large (if nine histones are considered,  $2^9 = 512$  combinations  
362 are possible), most genes are actually found in one among only about five major states (Fig. 2a). This  
363 challenges to some extent the notion of a histone code (Strahl and Allis, 2000). Further supporting the  
364 limited number of genic chromatin states, we found that marks act in a coordinated manner, meaning that  
365 genes showing a stable profile for one histone modification tend also to present stable profiles of the other  
366 marks, and that genes showing absence of one active mark tend to be void of all positive modifications  
367 (Figs. 4b-c, S4a). Most genes remain in the same chromatin state during transdifferentiation, irrespective  
368 of whether they are or not differentially expressed, explaining the low correlation between gene expres-  
369 sion and chromatin marks throughout time. Analysis of individual histone modifications further uncovered  
370 two unexpected findings regarding the chromatin marks typically associated with gene silencing. First, we  
371 observed that, although roughly 4,000 genes are down-regulated during the process, only 10% of them  
372 present H3K27me3 marking in at least one time-point, indicating that the majority of genes that are si-  
373 lenced along transdifferentiation do not depend on Polycomb repression. Second, we saw that H3K9me3  
374 marking at transcription start sites is associated more frequently with active transcription than gene silenc-  
375 ing (see Table S3, right side), contrary to what has been previously reported (Ninova et al., 2019). Actually,

376 H3K9me3 at the transcription start site has been previously related to active expression in malignant cells  
377 (Wiencke et al., 2008). Furthermore, these analyses also allowed us to identify a number of silent or stably  
378 expressed genes along transdifferentiation that show changes in chromatin marking (Figs. 3b-c).

379 While there is a general lack of coupling between gene expression and chromatin marking, there is a  
380 temporal relationship between gene expression and the different histone modifications at the time of gene  
381 activation. We propose a model (Fig. 7a) in which activation of gene expression is anticipated by deposi-  
382 tion of H3K4me1, H3K4me2, while deposition of other marks is concomitant or, more often, follows gene  
383 activation, being the gene body marks the last ones to be incorporated. The order of chromatin marking  
384 in our model is in agreement with the observed deposition of histone modifications upon induction of gene  
385 expression in human melanoma cells (Rybtsova et al., 2007), and with the notion that the methylation of  
386 some histone residues depends on the transcription machinery (Krogan et al., 2003). While we observed  
387 that certain modifications, such as H3K4me1/2 and H3K27ac tend to anticipate gene expression, this does  
388 not necessarily mean that they are the cause of transcription initiation. Actually, we have also observed  
389 particular cases in which these marks are deposited post-activation (for an example see Fig. 5b, middle  
390 panels). After the initial stage of gene activation, further changes in gene expression, even if substantial,  
391 appear to be mostly uncoupled from changes in histone modifications (Fig. 7b). It is tempting to speculate  
392 that after the initial burst of transcription, histone residues are saturated with modifications, and that there-  
393 fore, any further up-regulation of gene expression cannot possibly be accompanied by increased levels of  
394 histone modifications.

395 We do have identified a small set of genes that are expressed in the absence of any histone modification,  
396 with the exception of H3K4me1 and H3K4me2 (Figs. 4c, 5a-b lower panels). A few of these are activated  
397 later during the transdifferentiation process, and therefore we lack the temporal resolution to detect post-  
398 activation marking. Still, many of these genes are down-regulated or stably expressed, and are unmarked  
399 even at the beginning of transdifferentiation (for an example see Fig. 5b, lower panels). Gene activation  
400 without histone modifications has been previously observed for developmentally regulated genes in the fruit  
401 fly (Pérez-Lluch et al., 2015).

402 Here we have focused specifically on the dynamics of chromatin modifications during up-regulation.  
403 Our results suggest that down-regulation appears to be largely uncoupled from chromatin changes (Fig.  
404 S4h). However, while RNA sequencing-inferred expression levels can be used to approximately identify the  
405 time at which a gene is initially activated, differences in RNA stability may confound the identification of the  
406 time-point at which a gene is fully inactivated. Indeed, RNAs can be detected long after gene inactivation,  
407 for a time likely to be specific to each individual gene. Therefore, the data that we have generated does  
408 not have the appropriate resolution to discard that this lack of coupling during down-regulation is partially  
409 caused by the difficulty in precisely identifying the time-point at which genes stop being expressed.

410 The multi-omics data that we have generated during the pre-B cell transdifferentiation into macrophages  
411 has allowed us to address with unprecedented resolution some fundamental questions regarding the dy-  
412 namics of chromatin marking and gene expression during cellular differentiation, and have contributed to

413 shed light on some long-standing questions in the field. Further mining of this data resource will certainly  
414 contribute to a deeper understanding of the epigenetic layer of gene regulation.

## 415 **Acknowledgments**

416 We thank Thomas Graf and Francesca Rapino for donating BLaER1 cells and for helpful discussions. We  
417 thank Sebastian Ullrich, Carme Arnan and Vasilis Ntasis for helpful discussion about the data. We thank  
418 Montserrat Corominas, Guillaume Filion and Luciano Di Croce for insightful suggestions. We thank Diego  
419 Garrido-Martín, Manuel Muñoz and Javier Martín-Vallejo for statistical advice. We also thank the Genomics,  
420 the Flow Cytometry and the Bioinformatics Core Units of the CRG (Barcelona, Spain). We thank Romina  
421 Garrido for administrative support. We thank the ENCODE Consortium, in particular Thomas Gingeras',  
422 Bradley Bernstein's, John Stamatoyannopoulos' and Peggy Farhnam's laboratories, for data production.  
423 This work was performed under the financial support of the European Community under the FP7 pro-  
424 gram (ERC-2011-AdG-294653-RNA-MAPS). B.B. is supported by the fellowship 2017FI\_B00722 from the  
425 Secretaria d'Universitats i Recerca del Departament d'Empresa i Coneixement (Generalitat de Catalunya)  
426 and the European Social Fund (ESF). C.C.K. is supported by the CERCA Programme / Generalitat de  
427 Catalunya and FEDER under project VEIS-001-P-001647. B.R.C. is supported by the Ministerio de Cien-  
428 cia, Innovación y Universidades de España under grant FJCI-2017-34353. We also acknowledge Agencia  
429 Estatal de Investigación (AEI) and FEDER under project PGC2018-094017-B-I00. All authors acknowledge  
430 the support of the Ministerio de Ciencia, Innovación y Universidades de España to the EMBL partnership,  
431 the Centro de Excelencia Severo Ochoa, and the CERCA Programme / Generalitat de Catalunya.

## 432 **Author Contributions**

433 R.G. and R.J. conceived the project. B.B., S.P-L. and R.G. designed the study. B.B. performed the com-  
434 putational analyses. A.A. performed the ChIP-seq experiments. A.E. and M.S. performed the RNA-seq  
435 experiments. C.C.K. and E.P. contributed to data quality check and processing. C.C.K., R.N., M.R-R. and  
436 B.R.C. contributed tools and ideas to perform experiments and computational analyses. B.B., S.P-L. and  
437 R.G. wrote the manuscript with the contribution of all authors.

## 438 **Declaration of Interests**

439 The authors declare no competing interest.

## 440 Figures Legends

441 **Figure 1: Global behaviour and relationship between chromatin and expression during transdiffer-**  
442 **entiation** — See also Figs. S1-2-6, Tables S1-2. **a:** The transdifferentiation of human pre-B cells into  
443 macrophages lasts a period of seven days, which we monitored at twelve time-points. **b:** We have per-  
444 formed ChIP-seq of nine histone modifications and RNA-seq in whole-cell fraction, at twelve time-points  
445 along the process of transdifferentiation. All experiments were performed in two biological replicates. **c:**  
446 Trajectories of transdifferentiation derived from a Principal Component Analysis performed jointly on time-  
447 series gene expression and chromatin marks' profiles. **d:** Correlations between levels of gene expression  
448 and histone marks. For a given mark and for each of the twelve time-points, we computed the steady-state  
449 Pearson  $r$  value between the vector of expression levels and the vector of chromatin signals correspond-  
450 ing to the 12,248 genes. These twelve correlation values are represented by single dots, the size of the  
451 dot being proportional to the hours of the corresponding time-point. The median Pearson  $r$  values for each  
452 mark are: H3K27ac: 0.67; H3K9ac: 0.72; H4K20me1: 0.59; H3K36me3: 0.72; H3K4me3: 0.70; H3K4me1:  
453 0.51; H3K4me2: 0.61; H3K9me3: -0.07; H3K27me3: -0.17. In the case of time-course correlations, we  
454 obtained a Pearson  $r$  value for each expressed gene, and the distributions for all genes are represented by  
455 violin and box plots. Median Pearson  $r$  values across genes for each mark are: H3K27ac: 0.41; H3K9ac:  
456 0.44; H4K20me1: 0.45; H3K36me3: 0.43; H3K4me3: 0.29; H3K4me1: 0.10; H3K4me2: 0.10; H3K9me3:  
457 0.13; H3K27me3: -0.03.

458 **Figure 2: Genes are characterized by a limited number of major chromatin states, which are**  
459 **more stable than expression** — See also Fig. S3. **a:** A five-state multivariate HMM. Each state is defined  
460 by a combination of histone marks. We report the histone marks' signals corresponding to each state. The  
461 states are sorted by increasing level of marking averaged over the nine histone modifications, with a and  
462 e states characterized by the lowest and highest average level of marking, respectively. **b:** Heatmap rep-  
463 resenting the hierarchical clustering of the HMM profiles built along the transdifferentiation process for the  
464 12,248 genes. **c:** Arc diagram representing the types of state transitions observed in the HMM-sequence  
465 profiles of DE genes. The size of the arrow base is proportional to the number of genes reporting a given  
466 transition. Only transitions involving  $\geq 10$  genes are shown. We tested, for the sets of genes reporting  
467 each type of transition, the significance in gene expression fold-change (FC) (Wilcoxon Rank-Sum paired  
468 test, two-sided). The color of the arrow represents the average FC among genes experiencing a given  
469 transition. Transitions characterized by no significant changes in expression FC (Benjamini-Hochberg FDR  
470  $\geq 0.05$ ) are represented by gray arrows. Upper panel: transitions from weaker to stronger active chromatin  
471 marking. Lower panel: transitions from stronger to weaker active chromatin marking. **d:** Examples show-  
472 ing different HMM states along transdifferentiation. For each gene, expression and chromatin tracks from  
473 one biological replicate are displayed, as well as normalized line plots averaging the signal from the two  
474 replicates. Profiles of HMM states for the three genes are shown at the bottom. Left panels: example of an  
475 up-regulated gene (*NUCB1*) with a constant HMM state profile along transdifferentiation. Middle panels:  
476 example of an up-regulated gene (*CCR5*) transitioning first from absence of marking state (a) to low mark-

477 ing state (b), and from this to active marking state (d). Right panels: example of a down-regulated gene  
478 (*MCAM*) transitioning from active marking state (d) to bivalent marking state (c).

479 **Figure 3: Uncoupling of expression and chromatin marks throughout transdifferentiation** — See  
480 also Fig. S3, Tables S3-4. **a:** Expression and chromatin profiles across the 12 time-points (columns) for  
481 the set of 8,030 DE genes, distinguishing between differentially marked (DM), stably marked (SM) and un-  
482 marked (UM) genes (rows). The profiles consist of row-normalized z-scores, computed independently for  
483 expression and chromatin marks. **b:** Expression and chromatin profiles over the 12 time-points (columns)  
484 for the set of stably expressed genes that are differentially marked for a given histone modification along  
485 transdifferentiation. The profiles consist of row-normalized z-scores, computed independently for expres-  
486 sion and chromatin marks. The largest numbers of significantly variable profiles are observed for H3K27ac  
487 and H3K9ac. **c:** analogous representation to Fig. 3b for silent genes. In this case, H3K4me1 and H3K4me2  
488 are the most variable marks throughout the process.

489 **Figure 4: Chromatin marks show a coordinated behavior along transdifferentiation** — See also  
490 Fig. S4, Table S3. **a:** Decision-tree approach to label each of the 8,030 DE genes based on their chro-  
491 matin marking status and its relationship with the expression profile over time. The approach is applied  
492 independently for each of the nine histone marks. The first branch distinguishes between unmarked (ab-  
493 sence of peaks across all twelve time-points) and marked (presence of peaks in at least one time-point)  
494 genes. Within the set of marked genes, it further distinguishes between stably and differentially marked  
495 genes, i.e. genes characterized by absence and presence, respectively, of significant (maSigPro Benjamini-  
496 Hochberg  $FDR < 0.05$ ) changes in chromatin signal along the process. Differentially marked genes are  
497 further classified into genes with positive, null or negative time-course correlation with expression. **b:**  
498 We assessed the overlap between sets of genes corresponding to the decision-tree labels across differ-  
499 ent histone marks (hypergeometric test). Hierarchical clustering of the FDR values identifies three main  
500 clusters: a) genes showing expression profiles positively correlated with H3K27ac, H3K9ac, H3K4me3,  
501 H3K36me3, H3K4me1, H3K4me2, H4K20me1, and negatively correlated with H3K27me3; b) genes un-  
502 marked for H3K27ac, H3K9ac, H3K4me3, H3K4me1, H3K4me2, H4K20me1 and H3K36me3; c) genes  
503 with stable or uncorrelated profiles for H3K27ac and H3K9ac, stable profiles for H3K4me3, H3K36me3,  
504 H3K4me1, H3K4me2, H4K20me1, and unmarked for H3K27me3. The color code for the labels is anal-  
505 ogous to Fig. 4a. **c:** Similar results are obtained with Cluster Correspondence Analysis, a method that  
506 combines dimension reduction and cluster analysis for categorical data. Three-dimensional representation  
507 of the genes (analysis objects), grouped into three clusters (color-coded) based on the combinations of  
508 histone marks and labels they display.

509 **Figure 5: Chromatin marking is associated with expression specifically at the time of gene ac-**  
510 **tivation** — See also Fig. S4, Tables S5-6. **a:** Percent stacked bar plot representing, for each of the three  
511 clusters, the proportion of unmarked, stably marked, positively correlated, uncorrelated, and negatively cor-  
512 related genes identified with respect to each histone mark. **b:** Examples of genes belonging to each cluster.  
513 For each gene, expression and chromatin tracks from one biological replicate are displayed, as well as nor-



514 malized line plots averaging the signal from the two replicates. Profiles of HMM states for the three genes  
515 are shown at the bottom. Upper panels: example of an up-regulated gene (*ALDH3B1*) showing stable and  
516 uncorrelated profiles for active marking and absence of H3K9me3 and H3K27me3 along transdifferentia-  
517 tion. Middle panels: example of an up-regulated gene (*DAPP1*) showing positively correlated profiles for  
518 active marking and absence of H3K9me3 and H3K27me3 along transdifferentiation. Lower panels: exam-  
519 ple of a down-regulated gene (*U2AF1*) showing absence of marking along transdifferentiation. **c:** Percent  
520 stacked bar plot reporting the proportion of up-regulated genes in clusters 1-3 characterized by decreasing  
521 degrees of gene expression activation (bins of 10% decrement) at time-point 0h p.i. The degree of gene  
522 expression activation is defined as the ratio between the gene's expression level at 0h and its maximum  
523 expression level along transdifferentiation.

524 **Figure 6: Gene expression changes anticipate changes in most active marks for up-regulated**  
525 **genes.** — See also Fig. S5. **a:** Alluvial plot describing, for each of the seven canonical active histone  
526 marks, the number of genes, out of 257 genes activated during transdifferentiation (i.e. up-regulated genes  
527 not expressed ( $< 1$  TPM) at 0 hours p.i.), for which the up-regulation in a given mark's signal anticipates  
528 (light green), co-occurs with (green) or follows (dark green) gene expression up-regulation. For more de-  
529 tails see Fig. S5b. The flow lines indicate the number of genes exchanged among the three groups across  
530 increasing degrees of up-regulation. **b:** Lag (hours) between 25% up-regulation in histone marks' signal  
531 and expression level for the 257 selected up-regulated genes. Negative lags correspond to changes in  
532 chromatin marks anticipating changes in gene expression; positive lags correspond to changes in chro-  
533 matin marks following changes in gene expression. **c:** Upper panel: Heatmaps reporting the proportion  
534 (%) of genes activated during transdifferentiation whose changes in the chromatin mark on row  $i$  anticipate  
535 changes in the chromatin mark on column  $j$ . Like in the previous analyses, we considered four subsequent  
536 degrees of up-regulation (25%, 50%, 75% and 100%). e.g. the fraction reported in cell [row 1, column  
537 2] of the first heatmap (25%), corresponds to the percentage of genes for which the 25% up-regulation in  
538 H3K4me1 signal (yellow - row 1) anticipates the 25% up-regulation in H3K4me2 signal (ochre - column 2).  
539 Lower panel: analogous to upper panel for the 629 up-regulated genes already expressed ( $> 25$  TPM) at  
540 0h p.i. For this latter set of genes there is not a precise order of increase in chromatin marks. **d:** Mean and  
541 standard deviation of time-series expression and chromatin profiles for the 257 (left panel) and 629 (right  
542 panel) up-regulated genes that are not expressed and highly expressed, respectively, at 0 hours p.i. The  
543 expression and histone marks' time-series profiles of each gene were re-scaled to a 0-100% range prior to  
544 the analysis. We highlight in black the time-points at which the mean value is  $\geq 25\%$ .

545 **Figure 7: A model to explain the coupling between transcription and chromatin marking over**  
546 **time.** **a:** According to our model, chromatin marking correlates with expression specifically during the first  
547 stage of gene activation, and the deposition of histone marks follows a specific order. Further changes  
548 in gene expression that happen later in time are mostly uncoupled from chromatin marking. **b:** Examples  
549 of up-regulated genes inactive (*CCL2*) and highly active (*FTL*) at the beginning of transdifferentiation. For  
550 each gene, expression and chromatin tracks from one biological replicate are displayed, as well as nor-

551 malized line plots averaging the signal from the two replicates. Profiles of HMM states for the two genes  
552 are shown at the bottom. Left panels: for *CCL2*, most active histone modifications follow gene activation,  
553 with the exception of H3K4me1 and H3K4me2, which anticipate it. Right panels: for *FTL*, most active his-  
554 tone modifications remain stable along transdifferentiation, even though its absolute increase in expression  
555 is much higher than that of *CCL2*. **c**: Percentage (%) of unmarked, stably marked, positively correlated,  
556 uncorrelated and negatively correlated profiles within cluster 3, cluster 2 (0-25%, 25-75%, 75-100% activa-  
557 tion level), and cluster 1 up-regulated genes. Positively correlated genes are further separated into genes  
558 whose histone mark's up-regulation anticipates, co-occurs with or follows gene expression up-regulation.

## 559 **STAR Methods**

## 560 **RESOURCE AVAILABILITY**

### 561 **Lead Contact**

562 Further information and requests for resources and reagents should be directed to and will be fulfilled by  
563 the Lead Contact, Roderic Guigó (roderic.guigo@crg.cat).

### 564 **Materials Availability**

565 This study did not generate new unique reagents.

### 566 **Data and Code Availability**

567 The code generated during this study is available at [https://github.com/bborsari/Borsari\\_et\\_](https://github.com/bborsari/Borsari_et_al_transdifferentiation_chromatin)  
568 [al\\_transdifferentiation\\_chromatin](https://github.com/bborsari/Borsari_et_al_transdifferentiation_chromatin). A complete list of scripts used for each analysis described  
569 in the section *Method details* can be found at [https://github.com/bborsari/Borsari\\_et\\_al\\_](https://github.com/bborsari/Borsari_et_al_transdifferentiation_chromatin/blob/master/bin/table.scripts.tsv)  
570 [transdifferentiation\\_chromatin/blob/master/bin/table.scripts.tsv](https://github.com/bborsari/Borsari_et_al_transdifferentiation_chromatin/blob/master/bin/table.scripts.tsv). When not speci-  
571 fied in the text, the code used for a given analysis is included in the corresponding figure's script.

572 RNA-seq and ChIP-seq raw and processed data from this study have been submitted to ArrayExpress  
573 (<https://www.ebi.ac.uk/arrayexpress/>) under accession numbers E-MTAB-9790 and E-MTAB-  
574 9825, respectively.

575 Processed data in GRCh38/hg38 assembly from this study is available for visualization at the UCSC  
576 Genome Browser (Tyner et al., 2017, <http://genome.ucsc.edu/>). The track data hub is available at  
577 [https://public-docs.crg.es/rguigo/Data/bborsari/hubs/ERC\\_human\\_hub/hub.txt](https://public-docs.crg.es/rguigo/Data/bborsari/hubs/ERC_human_hub/hub.txt).

578 A web page has also been implemented to gather all information regarding the Chromatin and Tran-  
579 scriptomics Dynamics Project (<http://rnamaps.crg.eu/>). The web page provides information about  
580 all experiments and replicates performed during the project, as well as access to the data in ArrayExpress  
581 and the UCSC Genome Browser.

582 ENCODE data is freely available on the ENCODE portal (<https://www.encodeproject.org/>).  
583 Experiments and files accession IDs for RNA-seq and ChIP-seq data are reported in Supplementary Tables  
584 S5 and S6, respectively.

## 585 **EXPERIMENTAL MODEL AND SUBJECT DETAILS**

### 586 **Transdifferentiation of BLAER1 cells to macrophages**

587 For the transdifferentiation process we made use of the Burkitt lymphoma cell line BlaER1, as described in  
588 Rapino et al., 2013. Induction of transdifferentiation (treatment with 100  $\mu$ M  $\beta$ -estradiol and growth in the  
589 presence of 10 nM Il-3 and 10 nM CSF-1) has been described in Bussmann et al., 2009, and Xie et al.,

590 2004. The process was monitored at 12 time-points (as described in Rapino et al., 2013): 0, 3, 6, 9, 12,  
591 18, 24, 36, 48, 72, 120 and 168 hours post-induction (p.i.; Fig. 1a).

## 592 **METHOD DETAILS**

### 593 **RNA-seq library preparation and sequencing**

594 Two independent biological replicates for each time-point were performed. Briefly, cells were lysed with  
595 QiAZol (Qiagen, The Netherlands). Chloroform was added to each sample, and RNA contained in the  
596 aqueous solution was isolated and purified by using RNeasy mini kit columns (Qiagen, The Netherlands).  
597 Poly A+ libraries were prepared with 1 µg of total RNA and using TruSeq Stranded mRNA Library Prep  
598 Kit (Illumina, USA) according to the manufacturer's protocol. Libraries were analyzed using Agilent DNA  
599 1000 chips to determine the quantity and size distribution, and sequenced paired-end 75-bp on an Illumina  
600 HiSeq 2000.

### 601 **ChIP-seq library preparation and sequencing**

602 ChIP-seq experiments of nine histone marks (H3K4me1: Abcam ab8895; H3K4me2 : Millipore 07-030;  
603 H3K4me3: Abcam ab8580; H3K9ac: Abcam ab4441; H3K27ac: Diagenode C15410192; H3K36me3:  
604 Abcam ab9050; H4K20me1: Abcam ab9051; H3K9me3: Abcam ab8898; H3K27me3: Millipore 07-449)  
605 were performed in two independent biological replicates for each time-point. Cells were crosslinked with  
606 formaldehyde 1% (Sigma) for 10' at room temperature. The reaction was stopped by adding glycine to  
607 0.25 M final concentration for 10' at room temperature. Fixed cells were resuspended in 100 µL of lysis  
608 buffer (SDS 1%, EDTA 10 mM, TrisCl 50 mM and protease inhibitors). The lysate was sonicated for 25'  
609 using Covaris S2 system in TC12 tubes (Duty cycle 20%, Intensity 8, cycles/burst 200, water level 15).  
610 The cleared supernatant was used immediately in ChIP experiments or stored at -80 °C. 5 µg of sonicated  
611 chromatin were diluted in 900 µL RIPA buffer — H3K4me3, H3K9ac, H4K20me1, H3K27me3 and H3K27ac  
612 (140 mM NaCl, 10 mM Tris-HCl pH 8.0, 1 mM EDTA, 1% Triton X-100, 0.1% SDS, 0.1% Na deoxycholate,  
613 protease inhibitors) —, RIPA 2X — H3K4me1, H3K4me2 and H3K9me3 (280 mM NaCl, 10 mM Tris-  
614 HCl pH 8.0, 1 mM EDTA, 2% Triton X-100, 0.2% SDS, 0.2% Na deoxycholate, protease inhibitors) —,  
615 or RIPA 1X 1% triton — H3K36me3 (280 mM NaCl, 10 mM Tris-HCl pH 8.0, 1 mM EDTA, 1% Triton X-  
616 100, 0.2% SDS, 0.2% Na deoxycholate, protease inhibitors). For H3K4me3, H3K36me3, H3K9ac and  
617 H3K27me3 ChIPs, chromatin and antibodies were incubated overnight, rotating at 4 °C with 0.125-5 µg of  
618 specific antibody and samples were then incubated for 2 hours rotating at 4 °C with Dynabeads protein A  
619 for immunoprecipitation (Invitrogen) to recover the bound material. For H3K4me1, H3K4me2, H3K9me3,  
620 H4K20me1 and H3K27ac ChIPs, antibodies were coated to protein A magnetic beads for 2 hours at 4  
621 °C prior to overnight incubation with chromatin. In all cases, beads were washed for 10' three times in 1  
622 mL of the corresponding immunoprecipitation buffer without protease inhibitors, then washed once in 1 mL  
623 LiCl buffer (0.25 M LiCl, 0.5% NP-40, 0.5% sodium deoxycholate, 1 mM Na-EDTA, 10 mM Tris-HCl, pH

624 8.0), and finally washed twice in 1 mL of TE buffer (1 mM Na-EDTA, 10 mM Tris-HCl, pH 8.0). ChIPped  
625 material was incubated with DNase-free RNase at 50 µg/mL for 30' at 37 °C. Chromatin was reverse-  
626 crosslinked by adding SDS (0.5% final concentration) and Proteinase K (500 µg/mL final concentration)  
627 and incubated overnight at 65 °C. ChIPped chromatin was then purified with Qiaquick PCR purification  
628 columns (Qiagen) following the manufacturer's instructions. ChIP libraries were prepared with 1-5 ng of  
629 DNA and using NebNext Ultra DNA library prep kit for Illumina (New England Biolabs) according to the  
630 manufacturer's protocol. Libraries were analyzed using Agilent DNA High Sensitivity chips to determine the  
631 quantity and size distribution, and sequenced single-read 50-bp on an Illumina HiSeq 2000.

632 In total, 264 samples were sequenced (24 by RNA-seq, 216 by ChIP-seq, 24 by ChIP input).

### 633 RNA-seq data processing and analysis

634 Data was processed using the *grape-nf* (<https://github.com/guigolab/grape-nf>) Nextflow (Di Tom-  
635 maso et al., 2017) pipeline. RNA-seq reads were aligned to the human genome (assembly GRCh38, Gen-  
636 code annotation version 24) using the STAR software version 2.4.0j (Dobin et al., 2013). We allowed a  
637 maximum number of mismatches equal to 4% of the read length. Only alignments for reads mapping to ten  
638 or fewer loci were reported. Quantification of genes and transcripts was done with RSEM version 1.2.21  
639 (Li and Dewey, 2011). TPM calculation was performed after removing mitochondrial genes.

640 From the set of 19,831 protein-coding genes (Gencode v24), we selected 10,696 expressed genes with  
641 a maximum expression during transdifferentiation  $\geq 5$  TPM in both replicates, and 1,552 silent genes (0  
642 TPM in all time-points and replicates). Based on this set of 12,248 genes, we quantile-normalized the  
643 expression matrices ( $\log_2$ -transformed TPM, pseudocount of 1) across replicates and time-points using the  
644 R package preprocessCore (Bolstad et al., 2003, script: `quantile.normalization.R`), and obtained  
645 the mean expression levels between replicates (script: `matrix.matrix.mean.R`).

646 To detect significant gene expression changes along transdifferentiation, we used the R package maSig-  
647 Pro (Nueda et al., 2014) with replicates handled internally. Function `p.vector()` was run with default  
648 parameters: `Q = 0.05`, `MT.adjust = "BH"`, `min.obs = 20` (script: `maSigPro.wrapper.R`). We defined  
649 as stably expressed those genes reporting a maSigPro FDR value  $\geq 0.05$  ( $n = 2,666$ ).

650 As concerns the identification of up-regulated, down-regulated, peaking and bending genes, we per-  
651 formed a two-step classification across the 8,030 genes with significantly variable gene expression profiles.  
652 Briefly, we first focused on profiles with at least two-fold change (in  $\log_2$  scale this change corresponds to 1)  
653 and identified monotonic up-regulations and down-regulations; peaking profiles were defined as monotonic  
654 increases followed by monotonic decreases, bending profiles as the opposite (script: `classification.`  
655 `log2.pl`). All other significantly variable genes with fold-change  $< 2$  were assigned to one of these four  
656 groups following hierarchical clustering (distance measure: *euclidean*; clustering method: *complete*; script:  
657 `classification.2.R`).

## 658 **ChIP-seq data processing and analysis**

659 Data was processed using the *ChIP-nf* (<https://github.com/guigoLab/chip-nf>) Nextflow pipeline.  
660 ChIP-seq reads were aligned to the human genome assembly (GRCh38) using the GEM mapping software  
661 (Marco-Sola et al., 2012), allowing up to two mismatches. Only alignments for reads mapping to ten or fewer  
662 loci were reported. Duplicated reads were removed using Picard (<http://broadinstitute.github.io/picard/>).  
663 Pile-up signal from bigWig files was obtained running MACS2 (Zhang et al., 2008) on  
664 individual replicates. No shifting model was built. Instead, fragment length was set to 250 bp and was used  
665 to extend each read towards the 3' end (using the `--extsize` option). Pile-up signal was normalized by  
666 scaling larger samples to smaller samples (using the default for the `--scale-to` option) and adjusting  
667 signal per million reads (enabling the `--SPMR` option). Peak calling was performed using Zerone (Cuscó  
668 and Filion, 2016) with replicates handled internally, and passed the filter for all pairs of replicates (`advice:`  
669 `accept discretization`).

670 To check library complexity, we computed the fraction of non-redundant mapped reads (Landt et al.,  
671 2012) (recommended threshold:  $\text{NRF} \geq 0.8$ ) for each ChIP-seq experiment, and found a minimum NRF  
672 value of 0.92. Additionally, to evaluate the global ChIP enrichment, we computed the fraction of reads in  
673 peaks (Landt et al., 2012) (recommended threshold:  $\text{FRiP} \geq 0.01$ ), and found a minimum FRiP value of  
674 0.05.

675 The intersection / overlap analyses described below were performed with the function `intersectBed`  
676 of BEDTools software v2.27.1 (Quinlan and Hall, 2010).

677 To select the genomic location enriched, on average, in a specific histone mark (region of interest),  
678 we focused on an up-stream and down-stream 5 Kb region ( $\pm 5$  Kb) with respect to the first annotated  
679 Transcription Start Site (TSS) of the gene, and retrieved 6,063 protein-coding genes that did not overlap  
680 any other gene body  $\pm 5$  Kb. For each histone modification we then selected, among the 6,063 genes,  
681 those with peaks in the  $\pm 5$  Kb promoter region in all the 12 time-points, and computed, using the function  
682 `aggregate` from the `bwtool` software (Pohl and Beato, 2014, script: `bwtool.aggregate.ChIPseq.sh`),  
683 the mean pile-up signal for each experiment. Based on this analysis, we decided to select as regions of  
684 interest i) the gene body for H3K36me3 and H4K20me1, ii)  $\pm 2$  Kb with respect to the TSS for all other marks  
685 (Fig. S1c). A comprehensive catalogue of all non-redundant (same ensembl gene ID and start coordinate)  
686 TSSs annotated for the selected 12,248 in Gencode v24 was obtained with the script `non.redundant.`  
687 `TSS.sh`.

688 To compare expression and chromatin profiles over time, we quantified, for each of the nine histone  
689 marks, the amount of pile-up signal associated with a gene at each time-point (script: `get.matrix.`  
690 `chipseq.sh`). Briefly, if a peak was present in the region of interest of a gene at a specific time-point,  
691 we considered the mean pile-up signal in the intersection between the peak and the region of interest,  
692 otherwise we computed the mean pile-up value in the entire region of interest. In the presence of multiple  
693 peaks and/or multiple regions of interest (e.g. in case of multiple TSSs annotated for the same gene), we  
694 considered the highest of all observed values. Matrices of histone marks' signals for the selected 12,248

695 protein-coding genes were quantile-normalized across replicates and time-points using the R package  
696 preprocessCore as done for gene expression. For all down-stream analyses, we used the mean signal  
697 between replicates.

## 698 **Principal Component Analysis of expression and chromatin data**

699 For this type of analysis we made use of the transposed expression and chromatin matrices generated as  
700 described in sections *RNA-seq data processing and analysis* and *ChIP-seq data processing and analysis*,  
701 respectively. Therefore, genes (columns) and time-points (rows) were used as variables and observations,  
702 respectively. We centered and scaled each of the ten transposed matrices independently, obtaining z-  
703 score profiles for each time-point monitored at expression and histone marks' level. For the joint Principal  
704 Component Analysis (PCA) reported in Fig. 1c across expression and the nine histone marks, we included  
705 as variables the subset of 10,658 genes with non-missing (NA) z-score profiles in all ten matrices. As a  
706 consequence, 1,590 genes were excluded from this analysis, 98% of them being the silent genes (1,552).  
707 For the PCAs reported in Fig. S3d, we considered for each histone modification the corresponding sets of  
708 DE genes that are either stably or differentially marked.

## 709 **Analysis of the degree of correlation between expression levels and chromatin signals**

710 Steady-state correlations between gene expression levels and each histone mark's signals were computed  
711 at individual time-points considering the entire set of 12,248 selected protein-coding genes. In this case,  
712 Pearson  $r$  measured the degree of correlation between the vector of 12,248 expression levels and the vector  
713 of 12,248 mark signals at a given time-point (Fig. 1d, dots). Time-course correlations were measured,  
714 instead, at the level of individual expressed genes. Silent genes were not considered for this analysis,  
715 because of the zero standard deviation in their time-series expression profile (i.e. 0 TPM in all time-points).  
716 Thus, for each gene and histone mark we obtained the Pearson  $r$  correlation coefficient between the vector  
717 of 12 expression levels (i.e. the expression levels measured at the 12 time-points) and the vector of 12  
718 mark signals. The distributions of Pearson  $r$  correlation coefficients for the set of (differentially + stably)  
719 expressed genes are depicted with box plots and violin plots in Fig. 1d. Randomized steady-state and  
720 time-course correlation coefficients were computed as described above following a 1,000-permutations  
721 scheme on each histone mark's matrix. Briefly, while we kept the original expression matrix, the columns  
722 (time-points) of the matrix corresponding to a given mark's signal were permuted without repetition 1,000  
723 times (for an example, see Fig. S2a, lower panel). In the case of steady-state correlations we report,  
724 for each expression time-point, the Pearson  $r$  averaged over 1,000 rounds of permutation of chromatin  
725 time-points (Fig. S2b, dots). In the case of correlations computed across time-points (time-course), we  
726 computed, for each gene, the Pearson  $r$  averaged over the 1,000 rounds of permutations. The distributions  
727 of the resulting coefficients across the set of expressed genes are depicted in Fig. S2b (box plots and violin  
728 plots). Correlations were computed with the R function `cor()`. Permutations without replacement of the  
729 chromatin time-points were performed consistently across histone marks with the R function `sample()`, by

730 setting an independent seed for each round of permutations. The correlation values reported in Fig. S2c  
731 are an analogous exercise to Fig. 1d on the set of 8,030 differentially expressed genes.

### 732 **Multivariate Hidden Markov Model analysis**

733 A multivariate Hidden Markov Model (HMM) was fitted to the entire ChIP-seq dataset to approximate the  
734 set of underlying chromatin states reported by the 12,248 selected protein-coding genes along the transd-  
735 ifferentiation process. Specifically, we provided as input a matrix of dimensions 146,976 rows  $\times$  9 columns,  
736 which collected for each gene and time-point (12,248 genes, 12 time-points) the signal of each of the 9  
737 histone marks after quantile normalization (for a description of these calculations see previous section  
738 *ChIP-seq data processing and analysis*). The collective behavior of the nine histone marks along the  
739 twelve time-points was modelled as an independent time-series for each gene, using Gaussian distribu-  
740 tions. The model then reprocessed each gene's data to estimate the chromatin state of each gene at  
741 each time-point, and provide a time series of chromatin states for each gene. HMM was performed us-  
742 ing the R package depmixS4 (Visser and Speekenbrink, 2010), in particular functions `depmix()`, `fit()`  
743 and `posterior()` (script: `HMM.wrapper.marks.R`). We repeated the analysis for increasing numbers  
744 of states (between 2 and 20), and recorded the log likelihood of each model (the 20-states model reached  
745 the maximum number of iterations in EM without convergence). We found that somewhere between five  
746 and eight states approximate the elbow point of the log likelihood curve (Fig. S3a), and observed that  
747 the combinations of histone marks represented by five states were consistent with manual inspection of  
748 pile-up histone marks profiles in the UCSC genome browser. We thus set for five states. The response  
749 parameters of the nine histone marks corresponding to each of these states are reported in Fig. 2a. In  
750 this case, the *Intercept* values of each histone mark across the five states were re-scaled to a range  
751 0-1 to enable the comparison among different states and marks. HMM sequence hierarchical cluster-  
752 ing across the 12,248 genes was performed with the TraMineR (Gabadinho et al., 2011) and pheatmap  
753 (<https://github.com/raivokolde/pheatmap>) R packages (clustering distance: *euclidean*, cluster-  
754 ing method: *Ward.D2*). The arc diagram representation in Fig. 2c was obtained with the R package  
755 `arcdiagram` (<https://github.com/gastonstat/arcdiagram>).

### 756 **Decision-tree labelling**

757 In the Methods section *ChIP-seq data processing and analysis* we introduced the distinction between genes  
758 with and without peaks of a given mark at a given point in the region of interest (gene body for H3K36me3  
759 and H4K20me1; TSS  $\pm$  2 Kb for all other marks). Following this first assessment, we classified as unmarked  
760 those genes that were consistently unmarked throughout the whole process of transdifferentiation, i.e. with  
761 no peaks called at any time-point in the region of interest. Conversely, marked genes reported peak calls  
762 of a given mark in the region of interest in at least one time-point (Fig. 4a).

763 Within the set of marked genes, we defined as stably marked (SM) those that did not report significant  
764 changes detected by maSigPro (Nueda et al., 2014) over time (FDR  $\geq$  0.05). On the contrary, differentially



765 marked (DM) genes reported significant changes in a given mark's profile over time ( $FDR < 0.05$ ). To  
766 ensure a multiple testing correction procedure consistent among the nine marks and also with respect  
767 to gene expression, maSigPro was run, as described for gene expression (default parameters, replicates  
768 handled internally), on the initial set of 12,248 genes, which also included unmarked genes.

769 The next branch of classification (Fig. 4a) was applied only to the set of differentially marked genes that  
770 are also differentially expressed. To ensure consistent results among histone marks, the following multiple  
771 testing correction procedures were always applied to the set of 8,030 DE genes. For each DE gene, we  
772 computed at each time-point the breadth of a given mark's signal, defined as the fraction of the gene's  
773 size (from the first annotated region of interest until the last annotated Transcription Termination Site, TTS)  
774 covered by peaks of the mark. We refer to this vector of length 12 as the mark's coverage vector. We  
775 next considered i) Pearson  $r$  correlation coefficient between the time-series expression levels and mark's  
776 signals; ii) Pearson  $r$  correlation coefficient between the time-series expression levels and mark's coverage  
777 values; iii) statistical significance of the Needleman-Wunch (NW) dynamic time warping alignment be-  
778 tween the time-series expression levels and mark's signals (following Benjamini-Hochberg multiple testing  
779 correction; script: `p-adjust.R`). We used as input for the NW alignments (scripts: `NW.alignment.`  
780 `path.R`, `NW.bidirectional.matches.py`) the z-score profiles of expression and mark obtained after  
781 applying polynomial regression (`degree = 2`) on the original matrices (scripts: `loess.polynomial.`  
782 `regression.R`, `NW.generate.input.matrix.sh`). This procedure was applied to remove the noise  
783 due to occasional fluctuations in signal over time. A permutation  $p$  value for each gene was computed  
784 (script: `NW.pvalue.permutation.test.py`), based on a 100,000-permutations scheme (script: `NW.`  
785 `alignment.permutations.R`). To classify a gene as positively correlated, we required at least two of  
786 the following conditions: i) Pearson  $r$  correlation coefficient between the time-series expression levels and  
787 mark's signals  $\geq 0.60$  and  $FDR < 0.05$ ; ii) Pearson  $r$  correlation coefficient between the time-series expres-  
788 sion levels and mark's coverage values  $\geq 0.60$  and  $FDR < 0.05$ ; iii) NW alignment between the time-series  
789 expression levels and mark's signals with  $FDR < 0.05$ . For negatively correlated genes, we required at  
790 least two of the following conditions: i) Pearson  $r$  correlation coefficient between the time-series expres-  
791 sion levels and mark's signals  $\leq -0.60$  and  $FDR < 0.05$ ; ii) Pearson  $r$  correlation coefficient between the  
792 time-series expression levels and mark's coverage values  $\leq -0.60$  and  $FDR < 0.05$ ; iii) NW alignment be-  
793 tween the time-series expression levels and mark's signals with  $FDR \geq 0.05$ . Genes that did not meet  
794 these requirements were classified as uncorrelated. The same decision-tree classification was performed  
795 independently for each of the nine histone marks, to ensure comparable results among all modifications  
796 (script: `define.6.groups.R`).

## 797 Clustering analysis

798 We considered all 45 combinations between the 9 histone marks and the 5 decision-tree labels described in  
799 the previous section. For instance, one combination may be "stably marked + H3K4me3", and another com-  
800 bination may be "positively correlated + H3K27ac". To test the co-occurrence of this pair of combinations,

801 we retrieved the set of DE genes that are labelled “stably marked” for H3K4me3, and the set of DE genes  
802 that are labelled “positively correlated” for H3K27ac. The significant overlap between these two sets of  
803 genes was tested by the hypergeometric distribution (R function `phyper()`). We repeated this procedure  
804 for all possible pairs of combinations. We next clustered the  $p$  values obtained after applying the Benjamini-  
805 Hochberg False Discovery Rate (FDR) multiple testing correction. Hierarchical clustering was performed  
806 with the ComplexHeatmap (Gu et al., 2016) R package (clustering distance = *Manhattan*, clustering method  
807 = *Ward.D2*). Cluster correspondence analysis (van de Velden et al., 2017) of the 45 categorical variables  
808 (combinations of histone marks and decision-tree labels) across the 8,030 selected genes was performed  
809 with the R package `clustrd` (Markos et al., 2019). To select the optimal number of clusters and dimensions,  
810 we first run the function `tuneclus()` with the following parameters: `nclusrange = 3:10`, `ndimrange`  
811 `= 2:9`, `method = "clusCA"`, `nstart = 100`, `seed = 1234`. This indicated that the optimal number of  
812 dimensions and clusters was two and three, respectively. We then obtained the three clusters of genes  
813 running the function `clusmca` with the following parameters: `nclus = 3`, `ndim = 2`, `method = "clusCA"`,  
814 `nstart = 100`, `smartStart = NULL`, `gamma = TRUE`, `seed = 1234`. We obtained the same clusters of  
815 genes when running the function `clusmca` with the following parameters: `nclus = 3`, `ndim = 3`, `method`  
816 `= "MCAk"`, `alphak = 0.5`, `nstart = 100`, `smartStart = NULL`, `gamma = TRUE`, `seed = 1234`). This  
817 allowed us to explore the clustering of genes also in the third dimension (Figs. 4c, S4a).

## 818 Gene Ontology enrichment analysis

819 We used the R package `GOstats` (Falcon and Gentleman, 2007) to identify Gene Ontology (GO) terms  
820 related to biological processes (BP) and cellular compartments (CC). We set a  $p$  value threshold of 0.01 to  
821 identify significantly enriched terms. For the GO enrichment analysis on the genes contributing to Principal  
822 Components (PC) 1 and 2 (described in Results, section *Gene expression recapitulates transdifferentiation*  
823 *more precisely than chromatin*; Fig. 1c, Table S2), we used the function `get_pca_var()` from the R pack-  
824 age `factoextra` (<https://CRAN.R-project.org/package=factoextra>) to extract the 10% genes ( $n$   
825 = 1,066) with the highest contribution to each of the two first principal components. The union of these  
826 two sets of genes was used as background for the GO enrichment analysis. We used REVIGO (Supek  
827 et al., 2011; <http://revigo.irb.hr/>) to summarize the lists of enriched GO terms. For the GO enrich-  
828 ment analysis on the up-regulated genes that belong to the three chromatin clusters (described in Results,  
829 section *Chromatin marking is associated with expression specifically at the time of gene activation*), we  
830 provided as background the set of 2,103 up-regulated genes. In this case, we used REVIGO and the R  
831 package `ggplot2` (Wickham H, 2009) to compute and visualize, respectively, maps of the identified GO  
832 terms based on their frequency,  $-\log_{10} p$  value, uniqueness and dispensability. Only children terms with  
833 dispensability  $< 0.5$  are shown.

## 834 **Analysis of ENCODE RNA-seq and ChIP-seq data**

835 To investigate differences in gene expression levels and chromatin marking among the three clusters of DE  
836 genes in other biological models, we obtained RNA-seq data and ChIP-seq data for histone marks gener-  
837 ated by the ENCODE Project (Davis et al., 2018; Dunham et al., 2012; [https://www.encodeproject.](https://www.encodeproject.org/)  
838 [org/](https://www.encodeproject.org/)). Besides B cells and CD14-positive monocytes, which are biologically more similar to pre-B cells and  
839 macrophages, respectively, we selected five cancer cell lines (K562, HepG2, GM12878, MCF-7, A549) that  
840 are comprehensively characterized by ENCODE ChIP-seq data for the nine histone marks that we have  
841 profiled in our study. To assess differences in gene expression levels between the three clusters of DE  
842 genes, we obtained gene expression quantifications (with respect to Gencode v24) from polyA+ RNA-seq  
843 experiments (accession date: 10/06/2019). We computed, for each gene, the average TPM values be-  
844 tween two biological replicates. The list of experiments and datasets' accession IDs used for this analysis  
845 is reported in Table S5.

846 To assess differences in chromatin marking, we obtained ChIP-seq data available for the nine histone  
847 marks profiled in our study. (Assay title: Histone ChIP-seq; Genome assembly: GRCh38; Output type:  
848 replicated peaks or stable peaks; Accession date: 10/06/2019). The list of experiments and datasets'  
849 accession IDs used for this analysis is available in Table S6. In all cases, we excluded experiments asso-  
850 ciated with AUDIT errors. In case of multiple experiments on the same target and cell type, the experiment  
851 associated with the lowest number of AUDIT terms was selected. The scripts used to retrieve and filter  
852 the ENCODE experiments are: `download.metadata.sh`, `parse.metadata.audit.categories.`  
853 `py`, `retrieve.encode.identifiers.sh`, `parse.list.identifiers.sh`.

854 For each experiment and cell type, we computed the proportion of genes with at least one peak called  
855 over the gene body (H3K36me3, H4K20me1) or in the promoter region (TSS  $\pm 2$  Kb for all other marks;  
856 script: `intersect.peaks.regions.sh`). In the presence of multiple TSSs annotated for the same  
857 gene, multiple regions were considered. This is consistent with the analyses described in section *ChIP-seq*  
858 *data processing and analysis*.

## 859 **Analysis of temporal dynamics**

860 For this analysis we first identified, within the set of 2,103 up-regulated genes, 257 with expression at 0  
861 hours p.i.  $< 1$  TPM. These genes were, therefore, specifically activated during transdifferentiation. Ex-  
862 pression and chromatin profiles of each of the considered genes were re-scaled to range 0-100 (script:  
863 `rescale.R`): in this way, the minimum and maximum expression level or chromatin signal over the 12  
864 time-points were set to 0% and 100% of up-regulation, respectively. We next considered, for each gene,  
865 pairs of consecutive time-points along transdifferentiation (e.g. 0h and 3h; 3h and 6h; 6h and 9h; etc.),  
866 and recorded the first time-point at which the expression / chromatin profile crossed ( $\geq$ ) 25%, 50%, 75%  
867 and 100% degree of up-regulation (Fig. S5b). This “crossing” step implies that, in a pair of consecutive  
868 time-points, the signal corresponding to the first time-point is, for instance,  $< 25\%$ , and the signal corre-  
869 sponding to the second time-point is, for instance,  $\geq 25\%$ . This assessment is performed for each of the

870 four degrees of up-regulation. To ensure monotonic increases consistently across all histone marks, we  
871 excluded genes for which this “crossing” step could not be observed for all four degrees of up-regulation  
872 in a given mark’s time-series profile. This explains the different numbers of genes, among marks, reported  
873 in Figs. 6a and S5e. For a given gene and for each of the four degrees of up-regulation, the recorded  
874 time-points ( $tp$ ) for expression and chromatin profiles were compared, and a label was assigned depending  
875 on whether the up-regulation of chromatin signal anticipated ( $tp_{mark} < tp_{expression}$ ), co-occurred ( $tp_{mark} =$   
876  $tp_{expression}$ ) or followed ( $tp_{mark} > tp_{expression}$ ) the up-regulation of gene expression. We analogously com-  
877 pared the up-regulation between pairs of histone marks (Figs. 6c, S5d). In this case, we analyzed whether  
878 the up-regulation of histone mark’s signal on row  $i$  anticipated ( $tp_i < tp_j$ ) or co-occurred with ( $tp_i = tp_j$ ) the  
879 up-regulation of histone mark’s signal on column  $j$ . To assess whether the specific order of up-regulation  
880 in expression levels and chromatin signals depended on the initial level of expression of the genes, these  
881 analyses were repeated on a set of 629 up-regulated genes with expression at 0 hours p.i.  $> 25$  TPM.

## 882 **QUANTIFICATION AND STATISTICAL ANALYSIS**

883 Details regarding statistical tests, significance assessment, dispersion and precision measures are re-  
884 ported both in the section *Method details* and in the figures’ legends. All statistical analyses were per-  
885 formed using the R language for statistical computation and graphics (Team R. C., 2017; <http://www.R-project.org/>). In all cases, the multiple testing correction procedure was performed by applying  
886 the Benjamini-Hochberg False Discovery Rate (FDR; Benjamini and Hochberg, 1995). Wilcoxon rank-sum  
887 tests were performed with the `wilcox.test()` R function in a two-sided manner.

889 When not specified, plots were made using the R package ggplot2 (Wickham H, 2009). All box plots  
890 depict the first and third quartiles as the lower and upper bounds of the box, with a band inside the box  
891 showing the median value and whiskers representing 1.5x the interquartile range. All scripts used in the  
892 analyses are publicly available (see the *Data and Code Availability* statement).

## 893 Supplemental Figures Legends

894 **Supplemental Figure S1: Characterization of gene expression and histone modifications' profiles**  
895 **during transdifferentiation** — See also Fig. 1, Tables S1-2. **a:** Flow-cytometry plots assessing expression  
896 of CD19 and Mac-1 antigens at the 12 time-points monitored during transdifferentiation. **b:** Classification  
897 of time-series expression profiles. We selected a set of 12,248 protein-coding genes, which comprises  
898 1,552 not expressed genes (0 TPM in all time-points and biological replicates) and 10,696 expressed  
899 genes ( $\geq 5$  TPM in at least one time-point, and in both biological replicates). Within the set of expressed  
900 genes, we distinguished between genes with a stable expression profile throughout transdifferentiation  
901 (stably expressed; maSigPro FDR  $\geq 0.05$ ;  $n = 2,666$ ), and genes showing significant changes in gene  
902 expression over time (differentially expressed or DE; maSigPro FDR  $< 0.05$ ;  $n = 8,030$ ). DE genes were  
903 further characterized into bending (1,409), down-regulated (4,016), peaking (502) and up-regulated (2,103)  
904 genes. Examples of genes belonging to the six types of expression profiles are provided. Gene expression  
905 values are reported in  $\log_2$  (TPM + 1). **c:** Average pile-up signal over the gene body  $\pm 5$  Kb (H3K36me3 and  
906 H4K20me1), or promoter regions  $\pm 5$  Kb from the Transcription Start Site (TSS; all other marks), computed  
907 at each of the 12 time-points. The vertical dashed lines mark the selected region of  $\pm 2$  Kb around the TSS.  
908 **d:** Proportion of genes contributing to the first two principal components (PC1 and PC2) of the joint PCA  
909 on expression and chromatin marks (Fig. 1c), that are classified as bending, down-regulated, peaking,  
910 up-regulated or stably expressed.

911 **Supplemental Figure S2: The correlation between chromatin marking and gene expression over**  
912 **time is lower than the one reported in steady-state conditions.** — See also Fig. 1. **a:** Steady-state cor-  
913 relations between expression levels (x-axis) and H3K4me3 signals (y-axis) computed on the set of 12,248  
914 genes (silent genes: dark gray; stably expressed genes: gray; DE genes: light gray). Upper panel: Pearson  
915  $r$  between expression levels and H3K4me3 signals at paired time-points (0, 24, 48, 72, 120 and 168 hours).  
916 The magnitude of the correlation is reported on the top of each scatterplot. The linear regression line is  
917 depicted in brown. Lower panel: analogous representation after randomly shuffling the H3K4me3 signals  
918 among time-points. As a result, we computed the expression vs. chromatin correlation between unpaired  
919 time-points (0h - 24h; 24h - 120h; 48h - 168h; 72h - 0h; 120h - 72h; 168h - 48h). Steady-state correlations  
920 computed on the whole set of genes are large despite the randomization of the data. **b:** Steady-states  
921 (dots) and time-course (violin and box plots) correlation values between expression levels and chromatin  
922 signals (analogous to Fig. 1d) computed after randomly permuting the genes' signals of a given mark  
923 among time-points. In all cases we report the Pearson  $r$  values averaged over 1,000 permutations. For  
924 steady-states correlations, the median Pearson  $r$  values across time-points are: H3K27ac: 0.63; H3K9ac:  
925 0.68; H4K20me1: 0.54; H3K36me3: 0.69; H3K4me3: 0.69; H3K4me1: 0.50; H3K4me2: 0.59; H3K9me3:  
926 -0.08; H3K27me3: -0.16. For time-course correlations, the median Pearson  $r$  values across genes are 0  
927 ( $|r| < 0.001$ ) for all marks. **c:** Steady-states (dots) and time-course (violin and box plots) correlation values  
928 between expression levels and chromatin signals (analogous to Fig. 1d), computed after removing stably  
929 expressed and silent genes (i.e. only on the set of differentially expressed genes). The median steady-state

930 Pearson  $r$  values for each mark are: H3K27ac: 0.53; H3K9ac: 0.58; H4K20me1: 0.56; H3K36me3: 0.60;  
931 H3K4me3: 0.51; H3K4me1: 0.17; H3K4me2: 0.26; H3K9me3: -0.08; H3K27me3: -0.23. The median time-  
932 course Pearson  $r$  values for each mark are: H3K27ac: 0.53; H3K9ac: 0.55; H4K20me1: 0.55; H3K36me3:  
933 0.53; H3K4me3: 0.38; H3K4me1: 0.14; H3K4me2: 0.14; H3K9me3: 0.16; H3K27me3: -0.04. Silent genes  
934 contribute substantially to the steady state correlations, and partially contribute to the differences observed  
935 in Fig. 1d between steady-state and time-course correlations, since the latter cannot be computed for silent  
936 genes (see Methods).

937 **Supplemental Figure S3: Changes in chromatin marking over time can be uncoupled from**  
938 **changes in gene expression** — See also Figs. 2-3, Tables S3-4. **a:** Log likelihood values for HMM  
939 models with increasing number of states (between 2 and 20). **b:** Frequency of the five states observed  
940 along the twelve time-points of transdifferentiation in the HMM-sequence profiles of the sets of silent, stably  
941 expressed and differentially expressed (DE) genes. **c:** Distributions of genes' fold-change (FC: difference  
942 between maximum and minimum signals along transdifferentiation) for each histone mark. Differences in  
943 FC among sets of silent, stably expressed and DE genes were statistically assessed with Wilcoxon Rank-  
944 Sum test (two-sided). The magnitude of chromatin changes observed in stably expressed and silent genes  
945 is, in some cases, comparable to (H4K20me1 and H3K36me3 for silent; H3K27me3 and H3K9me3 for  
946 stably expressed), or even larger (H3K4me1 and H3K4me2 for silent) than the one observed for DE genes.  
947 **d:** Trajectories of transdifferentiation derived from a Principal Component Analysis performed jointly on  
948 expression and each histone mark's time-series profiles of DE genes, distinguishing between differentially  
949 marked (left) and stably marked (right) genes. Across all histone marks, transdifferentiation trends are  
950 clearer using the former set of genes, suggesting that the different resolution of PCA trends initially ob-  
951 served (Fig. 1c) may be explained by the different amount of changes observed, over time, across histone  
952 marks. Unexpectedly, H3K4me1-, H3K4me2- and H3K9me3-differentially marked genes show a contrast-  
953 ing profile for expression and chromatin modifications along PC2, but different to the pattern observed for  
954 H3K27me3.

955 **Supplemental Figure S4: Genes in different stages of activation are associated with specific**  
956 **chromatin and gene expression patterns, and perform distinct functions** — See also Figs. 4-5, Ta-  
957 bles S5-6. **a:** Three-dimensional representation of the combinations of labels and histone marks (analysis  
958 attributes). The color code for the labels is analogous to Fig. 4a. Histone marks are represented by num-  
959 bers. **b:** Distributions of gene expression levels at 0 and 168 hours p.i., and fold-change (FC) in gene  
960 expression (168h - 0h) for up-regulated genes that belong to clusters 1-3. Differences in gene expression  
961 levels among clusters were assessed with the Wilcoxon Rank-Sum test (two-sided). **c:** Density plot report-  
962 ing the time-point at which the time-series expression profiles of up-regulated genes in clusters 1-3 reach  
963 a degree of up-regulation  $\geq 25\%$ . For this analysis, the time-series expression profile of each gene was  
964 re-scaled to a 0-100% range. **d:** Multidimensional scaling-based representation of the semantic dissimilari-  
965 ties between non-redundant Gene Ontology Biological Process terms enriched among up-regulated genes  
966 in clusters 1-3. Each circle represents a term, with the size and the color of the circle denoting the  $-\log_{10}$

967  $p$  value and the cluster of the term, respectively. GO terms that lie close to each other are semantically  
968 more similar. **e**: Analogous representation to Fig. S4d for cellular compartments. Cluster 1 genes are  
969 associated with metabolic functions mostly performed in intracellular compartments, suggesting a more  
970 housekeeping nature of these up-regulated genes. Cluster 2 genes perform functions related to the in-  
971 flammatory response and to the cell membrane and projections, and are thus more likely to be involved in  
972 the transition from pre-B cells to macrophages. Cluster 3 genes are associated with macrophage-specific  
973 functions. **f**: Analysis of ENCODE RNA-seq data available for five cancer cell lines (MCF7, HepG2, A549,  
974 GM12878, K562), and two primary cell types (B cells and CD14+ monocytes) that are biologically simi-  
975 lar to the cell types present at the beginning (pre-B) and at the end (macrophages), respectively, of our  
976 transdifferentiation model. Distributions of gene expression levels for up-regulated genes that belong to  
977 clusters 1-3. Differences in gene expression levels among clusters were assessed using Wilcoxon Rank-  
978 Sum test (two-sided). **g**: Analysis of ENCODE ChIP-seq data for the nine histone marks we have monitored  
979 along transdifferentiation in five cancer cell lines (MCF7, HepG2, A549, GM12878, K562) and two primary  
980 cell types (B cells and CD14+ monocytes). Proportions (%) of marked genes at gene body (H3K36me3,  
981 H4K20me1) and promoter regions (all other marks) among up-regulated genes in clusters 1-3. **h**: Percent  
982 stacked bar plot depicting the proportion of bending, down-regulated, peaking and up-regulated genes that  
983 belong to the three clusters.

984 **Supplemental Figure S5: The up-regulation of chromatin marks and gene expression follows**  
985 **a precise order only during the initial stage of gene activation** — See also Fig. 6. **a**: Alluvial plot  
986 describing the HMM time-series profiles for the 257 (upper panel) and 629 (lower panel) up-regulated genes  
987 that are not expressed ( $< 1$  TPM) and expressed ( $> 25$  TPM), respectively, at 0 hours p.i. **b**: Graphical  
988 representation of cases in which the up-regulation of chromatin signal anticipates (left), co-occurs with  
989 (middle), or follows (right) the up-regulation of gene expression. The expression and histone marks' time-  
990 series profiles of each gene were re-scaled to a 0-100% range prior to the analysis. We considered four  
991 degrees of up-regulation (25%, 50%, 75% and 100%) and computed, for each gene and histone mark, the  
992 time-point at which the expression and chromatin re-scaled values reach each of the four degrees of up-  
993 regulation. Here we depict a representation for the degree of up-regulation of 25%. **c**: Lag (hours) between  
994 50%, 75% and 100% up-regulation in histone marks' signal and expression level for the 257 up-regulated  
995 genes not expressed at 0 hours p.i. Negative lags correspond to changes in chromatin marks anticipating  
996 changes in gene expression; positive lags correspond to changes in chromatin marks following changes  
997 in gene expression. **d**: Analogous representation to Fig. 6c for co-occurring changes between pairs of  
998 histone marks in genes that are either silent (upper panel) or expressed (lower panel) at 0 hours. For  
999 genes specifically activated during transdifferentiation (upper panel), the amount of co-occurring changes  
1000 increases towards the end of the up-regulation process. **e**: Analogous representation to Fig. 6a for the 629  
1001 up-regulated genes expressed at 0 hours p.i.

1002 **Supplemental Figure S6: Chromatin marking cannot be fully recapitulated by gene expression**  
1003 — See also Figs. 1, S1. **a**: Proportion of genes contributing to the first two principal components (PC1 and

1004 PC2) of the joint PCA on expression and chromatin marks in Fig. 1c, that belong to the three clusters of  
1005 DE genes (clusters 1-3) or that are stably expressed and differentially marked (“DM only”). While genes  
1006 contributing to the transition from pre-B cells to macrophages (pc1-contributing genes, Fig. 1c, Fig. S1d)  
1007 show the canonical correlation with chromatin changes (cluster 2), a considerable fraction of genes involved  
1008 in the intermediate stages of transdifferentiation (pc2-contributing genes) display expression and chromatin  
1009 changes uncoupled from one another (cluster 1, or stably expressed and differentially marked - “DM only”).  
1010 This further supports the hypothesis that chromatin changes are involved in a transient de-differentiation  
1011 from pre-B cells into an intermediate state, and re-differentiation into macrophages. **b**: Among the set  
1012 of stably expressed and differentially marked genes contributing to PC2 (“DM only” genes in Fig. S6a),  
1013 number of genes with variable chromatin profiles for increasing numbers of histone marks. For instance,  
1014 79 genes present changes in three histone modifications along transdifferentiation. **c**: Example of a stably  
1015 expressed gene (*TALDO1*) contributing to PC2 in the PCA in Fig. 1c, and showing significant changes  
1016 in some chromatin profiles along transdifferentiation. Expression and chromatin tracks from one biological  
1017 replicate are displayed, as well as normalized line plots averaging the signal from the two replicates. Profiles  
1018 of HMM states are shown at the bottom.

## 1019 Supplemental Tables Legends

1020 **Supplemental Table S1: Numbers of unmarked and marked genes within the sets of 1,552 silent**  
1021 **and 10,696 expressed genes** — See also Figs. 1, S1. For a given histone mark, unmarked genes have  
1022 no peaks called at any time-point in the region of interest, while marked genes have peaks called in the  
1023 region of interest in at least one time-point (see Methods).

1024 **Supplemental Table S2: GO terms significantly enriched among genes contributing to Principal**  
1025 **Components 1 and 2** — See also Figs. 1, S1. The list of terms refers to Biological Processes.

1026 **Supplemental Table S3: Decision-tree labelling of differentially expressed genes** — See also Figs.  
1027 3-4, S3. Left side: numbers of unmarked and marked genes within the set of DE genes. Marked genes  
1028 are further separated into genes that are either stably or differentially marked (i.e. have stable or variable  
1029 chromatin profiles during transdifferentiation). The percentages refer to the total number of DE genes ( $n$   
1030 = 8,030). Right side: within the set of differentially marked genes, we distinguish between genes that are  
1031 positively correlated, uncorrelated or negatively correlated with gene expression over time (see Methods).  
1032 The percentages in this case are computed with respect to the number of differentially marked genes found  
1033 for each histone modification.

1034 **Supplemental Table S4: Absent, stable and differential chromatin marking over time among**  
1035 **silent and stably expressed genes** — See also Figs. 3, S3. Numbers of unmarked and marked genes  
1036 within the sets of 1,552 silent and 2,666 stably expressed genes. Marked genes are further separated into  
1037 genes that are either stably or differentially marked.

1038 **Supplemental Table S5: ENCODE PolyA+ RNA-seq experiments in seven cell types** — See also



1039 Fig. S4. The ENCODE accession numbers allow to uniquely identify the experiment and gene expression  
1040 quantification file (tsv) on the ENCODE portal (<https://www.encodeproject.org/>).

1041 **Supplemental Table S6: ENCODE histone ChIP-seq experiments in seven cell types** — See also

1042 Fig. S4. The ENCODE accession numbers allow to uniquely identify the experiment and peak call file  
1043 (bigBed) on the ENCODE portal (<https://www.encodeproject.org/>).

1044 **Supplemental Table S7: Catalog of 12,248 protein-coding genes analyzed in this study.** For each  
1045 gene we provide the level of expression at 0 hours p.i. (average of the normalized levels from the two  
1046 biological replicates), the type of expression profile (silent / stably expressed / bending / down-regulated /  
1047 peaking / up-regulated) and the chromatin marking status (unmarked / stably marked / differentially marked)  
1048 with respect to each of the nine histone marks. In the case of DE genes, we further specify the type of  
1049 relationship with gene expression over time (positively correlated / uncorrelated / negatively correlated),  
1050 as well as the corresponding chromatin cluster (1: stable / uncorrelated marking; 2: positively correlated  
1051 marking; 3: absence of marking).

## 1052 **References**

- 1053 Bannister, A. J. and Kouzarides, T. (2011). Regulation of chromatin by histone modifications. *Cell Research*  
1054 *21*, 381–395.
- 1055 Barski, A., Cuddapah, S., Cui, K., Roh, T. Y., Schones, D. E., Wang, Z., Wei, G., Chepelev, I., and Zhao, K.  
1056 (2007). High-Resolution Profiling of Histone Methylations in the Human Genome. *Cell* *129*, 823–837.
- 1057 Benjamini, Y. and Hochberg, Y. (1995). Controlling the False Discovery Rate: A Practical and Powerful  
1058 Approach to Multiple Testing. *Journal of the Royal Statistical Society: Series B (Methodological)* *57*,  
1059 289–300.
- 1060 Berger, S. L., Kouzarides, T., Shiekhata, R., and Shilatifard, A. (2009). An operational definition of epige-  
1061 netics. *Genes and Development* *23*, 781–783.
- 1062 Bolstad, B. M., Irizarry, R. A., Åstrand, M., and Speed, T. P. (2003). A comparison of normalization methods  
1063 for high density oligonucleotide array data based on variance and bias. *Bioinformatics* *19*, 185–193.
- 1064 Bussmann, L. H., Schubert, A., Vu Manh, T. P., De Andres, L., Desbordes, S. C., Parra, M., Zimmermann,  
1065 T., Rapino, F., Rodriguez-Ubreva, J., Ballestar, E., et al. (2009). A Robust and Highly Efficient Immune  
1066 Cell Reprogramming System. *Cell Stem Cell* *5*, 554–566.
- 1067 Cao, K., Collings, C. K., Morgan, M. A., Marshall, S. A., Rendleman, E. J., Ozark, P. A., Smith, E. R.,  
1068 and Shilatifard, A. (2018). An Mll4/COMPASS-Lsd1 epigenetic axis governs enhancer function and  
1069 pluripotency transition in embryonic stem cells. *Science Advances* *4*, eaap8747.
- 1070 Cuscó, P. and Fillion, G. J. (2016). Zerone: A ChIP-seq discretizer for multiple replicates with built-in quality  
1071 control. *Bioinformatics* *32*, 2896–2902.
- 1072 Davis, C. A., Hitz, B. C., Sloan, C. A., Chan, E. T., Davidson, J. M., Gabdank, I., Hilton, J. A., Jain, K.,  
1073 Baymuradov, U. K., Narayanan, A. K., et al. (2018). The Encyclopedia of DNA elements (ENCODE):  
1074 Data portal update. *Nucleic Acids Research* *46*, D794–D801.
- 1075 Di Tommaso, P., Chatzou, M., Floden, E. W., Barja, P. P., Palumbo, E., and Notredame, C. (2017). Nextflow  
1076 enables reproducible computational workflows. *Nature Biotechnology* *35*, 316–319.
- 1077 Di Tullio, A., Vu Manh, T. P., Schubert, A., Månsson, R., and Graf, T. (2011). CCAAT/enhancer binding  
1078 protein  $\alpha$  (C/EBP $\alpha$ )-induced transdifferentiation of pre-B cells into macrophages involves no overt retrod-  
1079 ifferentiation. *Proceedings of the National Academy of Sciences of the United States of America* *108*,  
1080 17016–17021.
- 1081 Dobin, A., Davis, C. A., Schlesinger, F., Drenkow, J., Zaleski, C., Jha, S., Batut, P., Chaisson, M., and  
1082 Gingeras, T. R. (2013). STAR: Ultrafast universal RNA-seq aligner. *Bioinformatics* *29*, 15–21.

- 1083 Dong, X., Greven, M. C., Kundaje, A., Djebali, S., Brown, J. B., Cheng, C., Gingeras, T. R., Gerstein, M.,  
1084 Guigó, R., Birney, E., et al. (2012). Modeling gene expression using chromatin features in various cellular  
1085 contexts. *Genome Biology* 13, R53.
- 1086 Dorighi, K. M., Swigut, T., Henriques, T., Bhanu, N. V., Scruggs, B. S., Nady, N., Still, C. D., Garcia, B. A.,  
1087 Adelman, K., and Wysocka, J. (2017). Mll3 and Mll4 Facilitate Enhancer RNA Synthesis and Transcription  
1088 from Promoters Independently of H3K4 Monomethylation. *Molecular Cell* 66, 568–576.
- 1089 Dunham, I., Kundaje, A., Aldred, S. F., Collins, P. J., Davis, C. A., Doyle, F., Epstein, C. B., Fietze, S.,  
1090 Harrow, J., Kaul, R., et al. (2012). An integrated encyclopedia of DNA elements in the human genome.  
1091 *Nature* 489, 57–74.
- 1092 Ernst, J. and Kellis, M. (2012). ChromHMM: Automating chromatin-state discovery and characterization.  
1093 *Nature Methods* 9, 215–216.
- 1094 Falcon, S. and Gentleman, R. (2007). Using GOstats to test gene lists for GO term association. *Bioinfor-*  
1095 *matics* 23, 257–258.
- 1096 Frankish, A., Diekhans, M., Ferreira, A. M., Johnson, R., Jungreis, I., Loveland, J., Mudge, J. M., Sisu,  
1097 C., Wright, J., Armstrong, J., et al. (2019). GENCODE reference annotation for the human and mouse  
1098 genomes. *Nucleic Acids Research* 47, D766–D773.
- 1099 Gabadinho, A., Ritschard, G., Müller, N. S., and Studer, M. (2011). Analyzing and visualizing state se-  
1100 quences in R with TraMineR. *Journal of Statistical Software* 40, 1–37.
- 1101 Greer, E. L. and Shi, Y. (2012). Histone methylation: A dynamic mark in health, disease and inheritance.  
1102 *Nature Reviews Genetics* 13, 343–357.
- 1103 Gu, Z., Eils, R., and Schlesner, M. (2016). Complex heatmaps reveal patterns and correlations in multidimensional genomic data. *Bioinformatics* 32, 2847–2849.
- 1105 Hansen, K. H., Bracken, A. P., Pasini, D., Dietrich, N., Gehani, S. S., Monrad, A., Rappsilber, J., Lerdrup,  
1106 M., and Helin, K. (2008). A model for transmission of the H3K27me3 epigenetic mark. *Nature Cell*  
1107 *Biology* 10, 1291–1300.
- 1108 Henikoff, S. and Shilatifard, A. (2011). Histone modification: Cause or cog? *Trends in Genetics* 27,  
1109 389–396.
- 1110 Hödl, M. and Basler, K. (2012). Transcription in the absence of histone H3.2 and H3K4 methylation. *Current*  
1111 *Biology* 22, 2253–2257.
- 1112 Hoffman, M. M., Buske, O. J., Wang, J., Weng, Z., Bilmes, J. A., and Noble, W. S. (2012). Unsupervised  
1113 pattern discovery in human chromatin structure through genomic segmentation. *Nature Methods* 9,  
1114 473–476.

- 1115 Hon, G., Wang, W., and Ren, B. (2009). Discovery and Annotation of Functional Chromatin Signatures in  
1116 the Human Genome. *PLoS Computational Biology* *5*, e1000566.
- 1117 Kaikkonen, M. U., Spann, N. J., Heinz, S., Romanoski, C. E., Allison, K. A., Stender, J. D., Chun, H. B.,  
1118 Tough, D. F., Prinjha, R. K., Benner, C., et al. (2013). Remodeling of the enhancer landscape during  
1119 macrophage activation is coupled to enhancer transcription. *Molecular Cell* *51*, 310–325.
- 1120 Karlič, R., Chung, H. R., Lasserre, J., Vlahoviček, K., and Vingron, M. (2010). Histone modification levels  
1121 are predictive for gene expression. *Proceedings of the National Academy of Sciences of the United*  
1122 *States of America* *107*, 2926–2931.
- 1123 Krogan, N. J., Dover, J., Wood, A., Schneider, J., Heidt, J., Boateng, M. A., Dean, K., Ryan, O. W., Golshani,  
1124 A., Johnston, M., et al. (2003). The Paf1 complex is required for histone H3 methylation by COMPASS  
1125 and Dot1p: Linking transcriptional elongation to histone methylation. *Molecular Cell* *11*, 721–729.
- 1126 Landt, S. G., Marinov, G. K., Kundaje, A., Kheradpour, P., Pauli, F., Batzoglou, S., Bernstein, B. E., Bickel,  
1127 P., Brown, J. B., Cayting, P., et al. (2012). ChIP-seq guidelines and practices of the ENCODE and  
1128 modENCODE consortia. *Genome Research* *22*, 1813–1831.
- 1129 Le Martelot, G., Canella, D., Symul, L., Migliavacca, E., Gilardi, F., Liechti, R., Martin, O., Harshman, K.,  
1130 Delorenzi, M., Desvergne, B., et al. (2012). Genome-Wide RNA Polymerase II Profiles and RNA Ac-  
1131 cumulation Reveal Kinetics of Transcription and Associated Epigenetic Changes During Diurnal Cycles.  
1132 *PLoS Biology* *10*, e1001442.
- 1133 Li, B. and Dewey, C. N. (2011). RSEM: Accurate transcript quantification from RNA-Seq data with or without  
1134 a reference genome. *BMC Bioinformatics* *12*, 323.
- 1135 Marco-Sola, S., Sammeth, M., Guigó, R., and Ribeca, P. (2012). The GEM mapper: Fast, accurate and  
1136 versatile alignment by filtration. *Nature Methods* *9*, 1185–1188.
- 1137 Markos, A., D’enza, A. I., and van de Velden, M. (2019). Beyond tandem analysis: Joint dimension reduc-  
1138 tion and clustering in R. *Journal of Statistical Software* *91*, 1–24.
- 1139 Mercer, E. M., Lin, Y. C., Benner, C., Jhunjunwala, S., Dutkowski, J., Flores, M., Sigvardsson, M., Ideker,  
1140 T., Glass, C. K., and Murre, C. (2011). Multilineage Priming of Enhancer Repertoires Precedes Commit-  
1141 ment to the B and Myeloid Cell Lineages in Hematopoietic Progenitors. *Immunity* *35*, 413–425.
- 1142 Nègre, N., Brown, C. D., Ma, L., Bristow, C. A., Miller, S. W., Wagner, U., Kheradpour, P., Eaton, M. L.,  
1143 Loriaux, P., Sealfon, R., et al. (2011). A cis-regulatory map of the *Drosophila* genome. *Nature* *471*,  
1144 527–531.
- 1145 Ninova, M., Tóth, K. F., and Aravin, A. A. (2019). The control of gene expression and cell identity by H3K9  
1146 trimethylation. *Development* *146*, dev.181180.

- 1147 Nueda, M. J., Tarazona, S., and Conesa, A. (2014). Next maSigPro: Updating maSigPro bioconductor  
1148 package for RNA-seq time series. *Bioinformatics* *30*, 2598–2602.
- 1149 Pérez-Lluch, S., Blanco, E., Tilgner, H., Curado, J., Ruiz-Romero, M., Corominas, M., and Guigó, R. (2015).  
1150 Absence of canonical marks of active chromatin in developmentally regulated genes. *Nature Genetics*  
1151 *47*, 1158–1167.
- 1152 Pervouchine, D. D., Djebali, S., Breschi, A., Davis, C. A., Barja, P. P., Dobin, A., Tanzer, A., Lagarde, J.,  
1153 Zaleski, C., See, L. H., et al. (2015). Enhanced transcriptome maps from multiple mouse tissues reveal  
1154 evolutionary constraint in gene expression. *Nature Communications* *6*, 1–11.
- 1155 Pohl, A. and Beato, M. (2014). bwtool: A tool for bigWig files. *Bioinformatics* *30*, 1618–1619.
- 1156 Quinlan, A. R. and Hall, I. M. (2010). BEDTools: a flexible suite of utilities for comparing genomic features.  
1157 *Bioinformatics* *26*, 841–842.
- 1158 Rach, E. A., Winter, D. R., Benjamin, A. M., Corcoran, D. L., Ni, T., Zhu, J., and Ohler, U. (2011). Transcrip-  
1159 tion Initiation Patterns Indicate Divergent Strategies for Gene Regulation at the Chromatin Level. *PLoS*  
1160 *Genetics* *7*, e1001274.
- 1161 Rapino, F., Robles, E. F., Richter-Larrea, J. A., Kallin, E. M., Martinez-Climent, J. A., and Graf, T. (2013).  
1162 C/EBP $\alpha$  Induces Highly Efficient Macrophage Transdifferentiation of B Lymphoma and Leukemia Cell  
1163 Lines and Impairs Their Tumorigenicity. *Cell Reports* *3*, 1153–1163.
- 1164 Rickels, R., Herz, H. M., Sze, C. C., Cao, K., Morgan, M. A., Collings, C. K., Gause, M., Takahashi,  
1165 Y. H., Wang, L., Rendleman, E. J., et al. (2017). Histone H3K4 monomethylation catalyzed by Trr and  
1166 mammalian COMPASS-like proteins at enhancers is dispensable for development and viability. *Nature*  
1167 *Genetics* *49*, 1647–1653.
- 1168 Rivera, C. M. and Ren, B. (2013). Mapping human epigenomes. *Cell* *155*, 39–55.
- 1169 Rybtsova, N., Leimgruber, E., Seguin-Estevez, Q., Dunand-Sauthier, I., Krawczyk, M., and Reith, W.  
1170 (2007). Transcription-coupled deposition of histone modifications during MHC class II gene activation.  
1171 *Nucleic Acids Research* *35*, 3431–3441.
- 1172 Schneider, R., Bannister, A. J., Myers, F. A., Thorne, A. W., Crane-Robinson, C., and Kouzarides, T. (2004).  
1173 Histone H3 lysine 4 methylation patterns in higher eukaryotic genes. *Nature Cell Biology* *6*, 73–77.
- 1174 Sekhon, A., Singh, R., and Qi, Y. (2018). DeepDiff: DEEP-learning for predicting DIFFerential gene ex-  
1175 pression from histone modifications. *Bioinformatics* *34*, i891–i900.
- 1176 Simpson, E. H. (1951). The Interpretation of Interaction in Contingency Tables. *Journal of the Royal*  
1177 *Statistical Society. Series B (Methodological)* *13*, 238–241.

- 1178 Song, J. and Chen, K. C. (2015). Spectacle: Fast chromatin state annotation using spectral learning.  
1179 *Genome Biology* 16, 33.
- 1180 Strahl, B. D. and Allis, C. D. (2000). The language of covalent histone modifications. *Nature* 403, 41–45.
- 1181 Supek, F., Bošnjak, M., Škunca, N., and Šmuc, T. (2011). REVIGO Summarizes and Visualizes Long Lists  
1182 of Gene Ontology Terms. *PLoS ONE* 6, e21800.
- 1183 Team R. C. (2017). R: A Language and Environment for Statistical Computing. R Foundation for Statistical  
1184 Computing, Vienna, Austria.
- 1185 Trojer, P. and Reinberg, D. (2007). Facultative Heterochromatin: Is There a Distinctive Molecular Signature?  
1186 *Molecular Cell* 28, 1–13.
- 1187 Tyner, C., Barber, G. P., Casper, J., Clawson, H., Diekhans, M., Eisenhart, C., Fischer, C. M., Gibson,  
1188 D., Navarro Gonzalez, J., Guruvadoo, L., et al. (2017). The UCSC Genome Browser database: 2017  
1189 update. *Nucleic Acids Research* 45, D626–D634.
- 1190 van de Velden, M., D’Enza, A. I., and Palumbo, F. (2017). Cluster Correspondence Analysis. *Psychome-*  
1191 *trika* 82, 158–185.
- 1192 Vandebon, A., Kumagai, Y., Lin, M., Suzuki, Y., and Nakai, K. (2018). Waves of chromatin modifications  
1193 in mouse dendritic cells in response to LPS stimulation. *Genome Biology* 19, 138.
- 1194 Visser, I. and Speekenbrink, M. (2010). depmixS4: An R package for hidden markov models. *Journal of*  
1195 *Statistical Software* 36, 1–21.
- 1196 Waddington, C. H. (1942). The epigenotype. *Endeavour* 1, 18–20.
- 1197 Wang, S., Chen, J., Garcia, S. P., Liang, X., Zhang, F., Yan, P., Yu, H., Wei, W., Li, Z., Wang, J., et al. (2019).  
1198 A dynamic and integrated epigenetic program at distal regions orchestrates transcriptional responses to  
1199 VEGFA. *Genome Research* 29, 193–207.
- 1200 Wickham H (2009). *ggplot2: Elegant Graphics for Data Analysis*. Springer-Verlag, New York City, New  
1201 York.
- 1202 Wiencke, J. K., Zheng, S., Morrison, Z., and Yeh, R. F. (2008). Differentially expressed genes are marked  
1203 by histone 3 lysine 9 trimethylation in human cancer cells. *Oncogene* 27, 2412–2421.
- 1204 Xie, H., Ye, M., Feng, R., and Graf, T. (2004). Stepwise reprogramming of B cells into macrophages. *Cell*  
1205 117, 663–676.
- 1206 Yin, Q., Wu, M., Liu, Q., Lv, H., and Jiang, R. (2019). DeepHistone: A deep learning approach to predicting  
1207 histone modifications. *BMC Genomics* 20, 193.

- 1208 Zhang, Y., An, L., Yue, F., and Hardison, R. C. (2016). Jointly characterizing epigenetic dynamics across  
1209 multiple human cell types. *Nucleic Acids Research* *44*, 6721–6731.
- 1210 Zhang, Y. and Hardison, R. C. (2017). Accurate and reproducible functional maps in 127 human cell types  
1211 via 2D genome segmentation. *Nucleic Acids Research* *45*, 9823–9836.
- 1212 Zhang, Y., Liu, T., Meyer, C. A., Eeckhoute, J., Johnson, D. S., Bernstein, B. E., Nusbaum, C., Myers, R. M.,  
1213 Brown, M., Li, W., et al. (2008). Model-based Analysis of ChIP-Seq (MACS). *Genome Biology* *9*, R137.

**Figure 1**

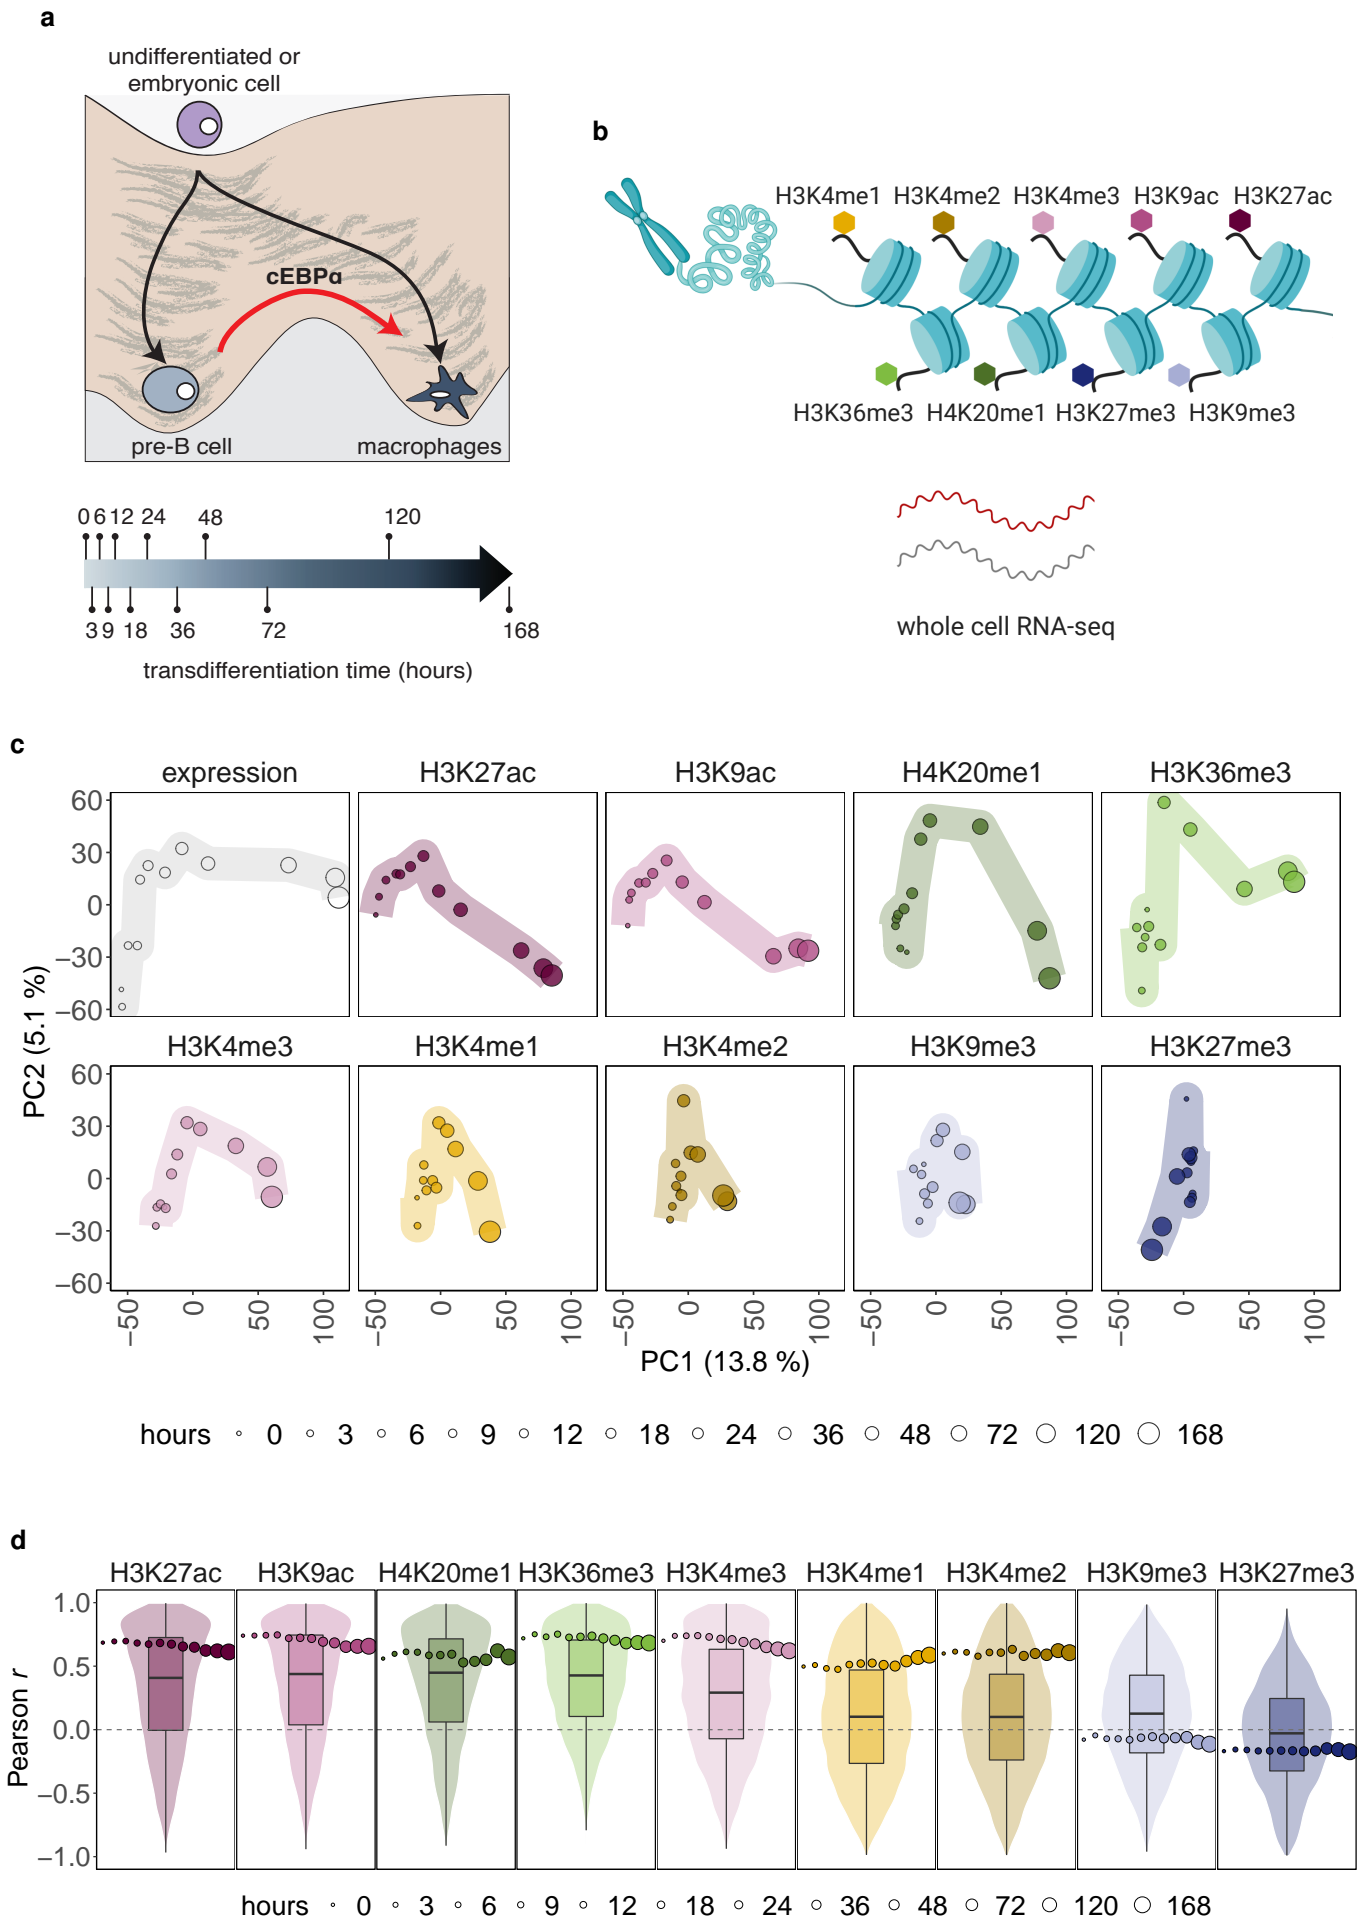



**Figure 2**

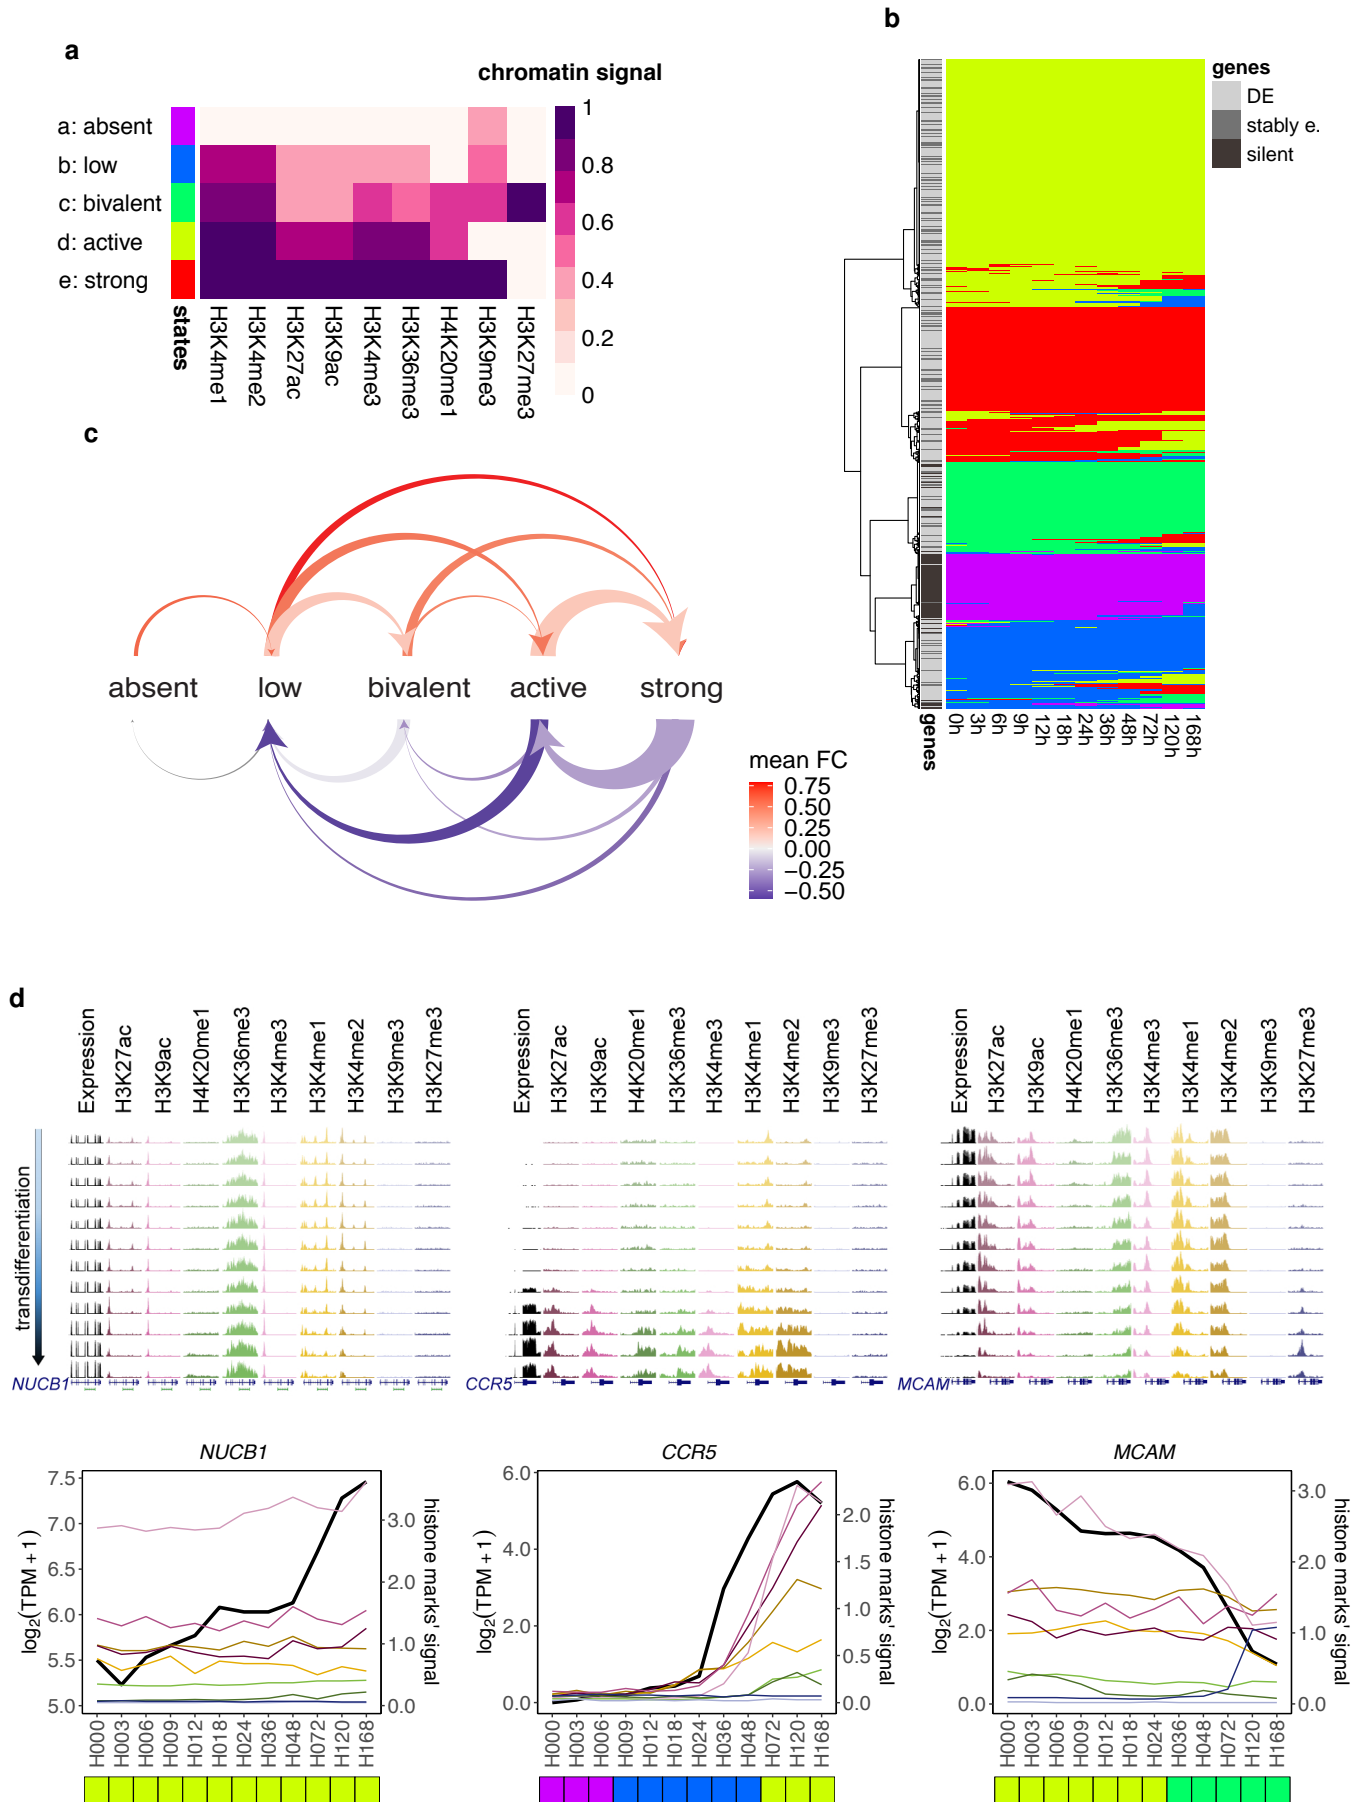

**Figure 3**

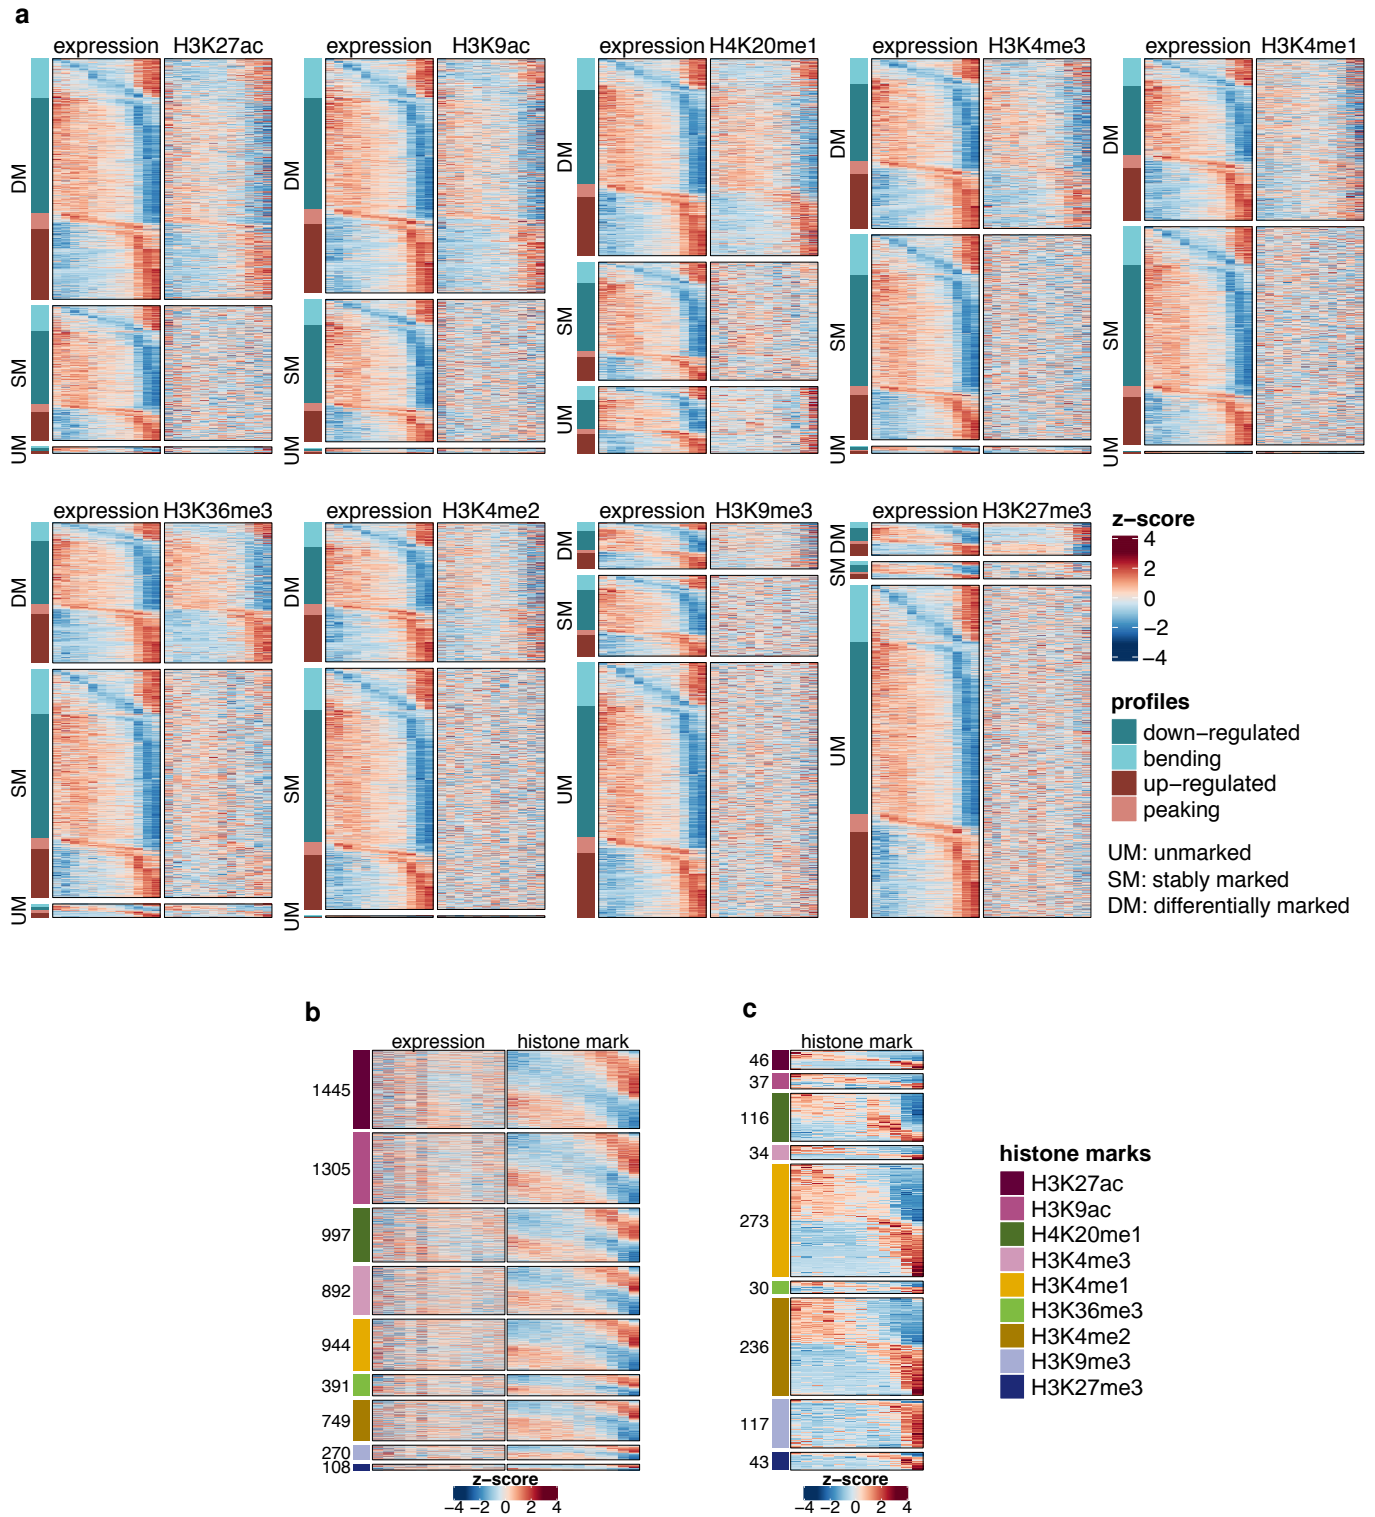

**Figure 4**

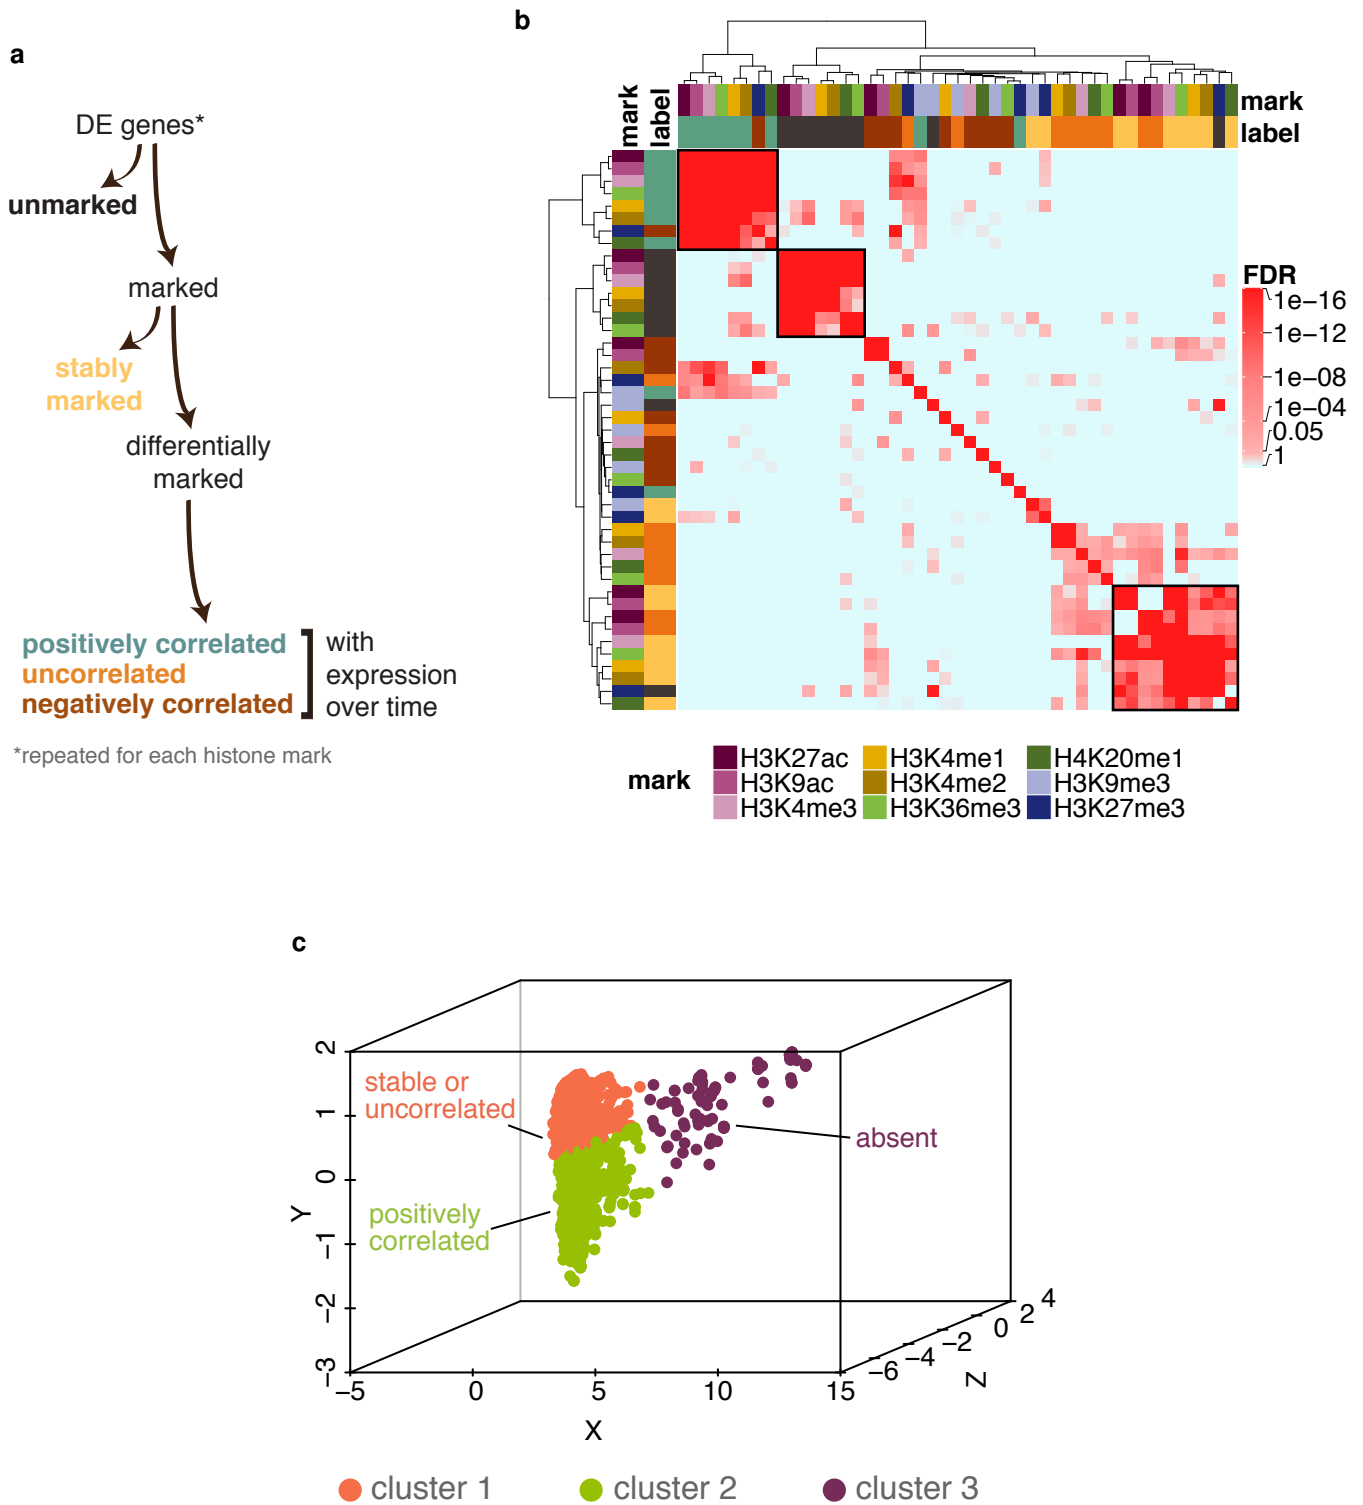

**Figure 5**

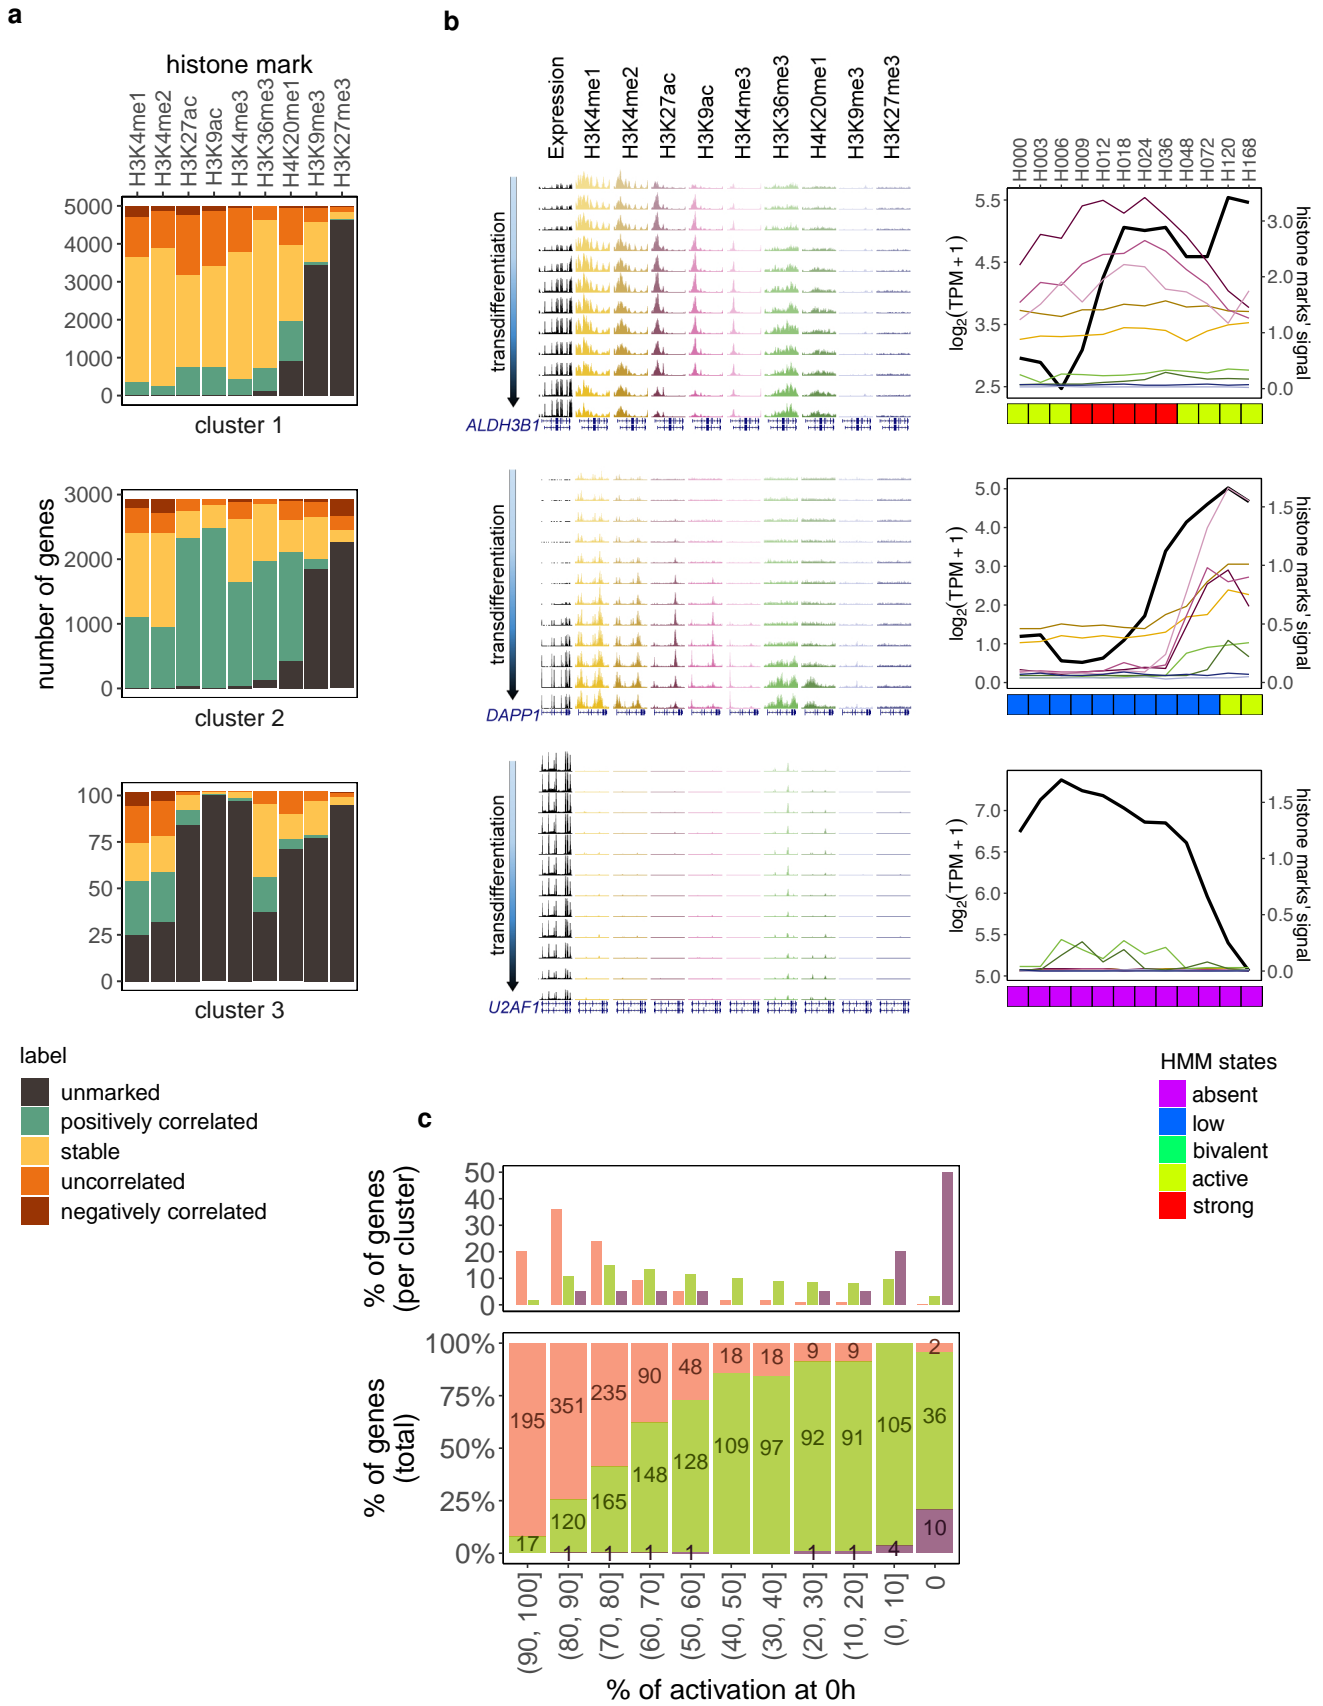

**Figure 6**

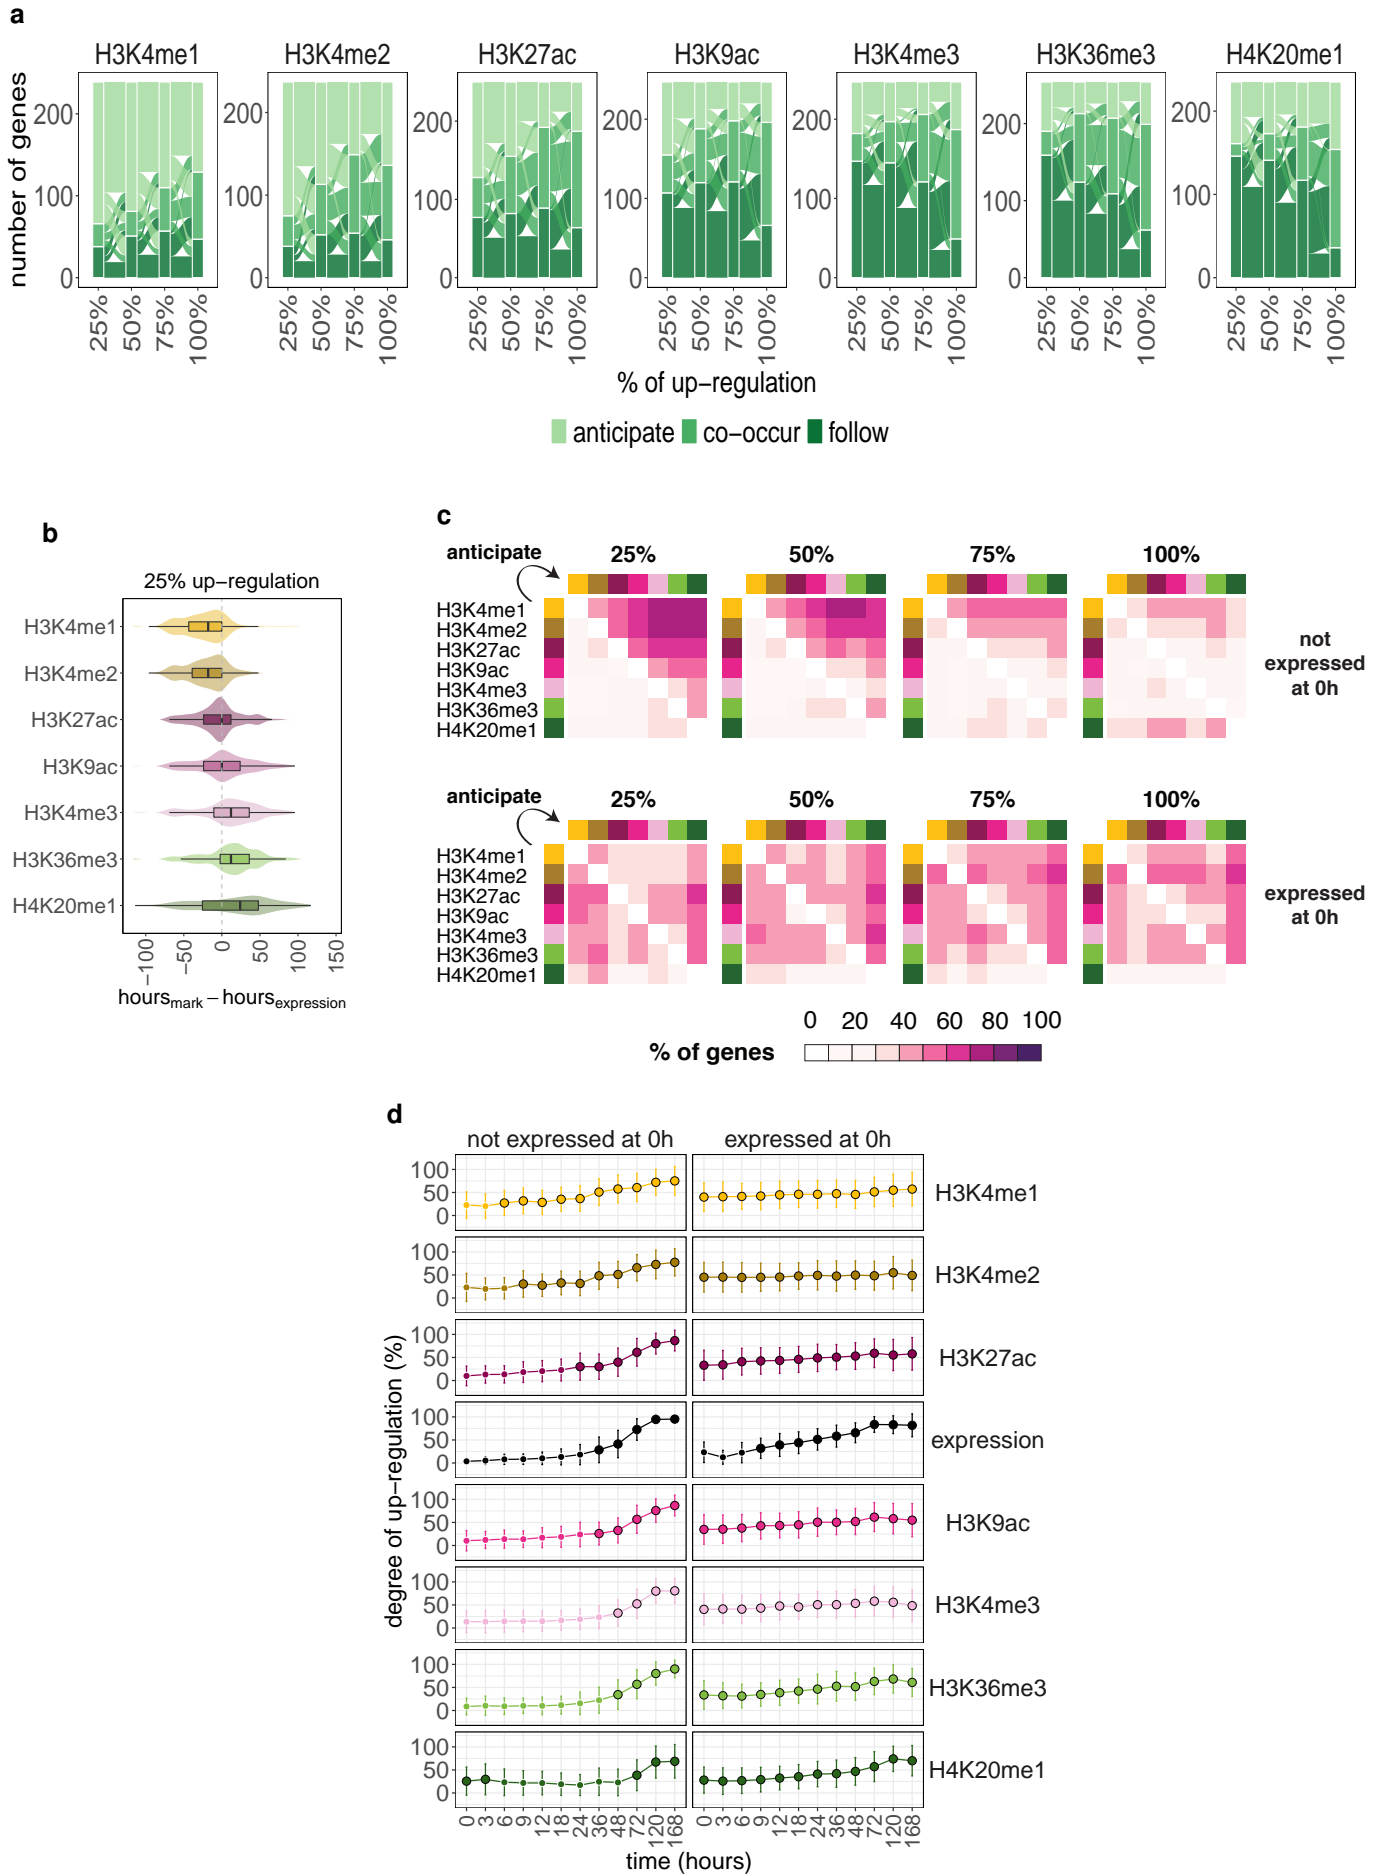

**Figure 7**

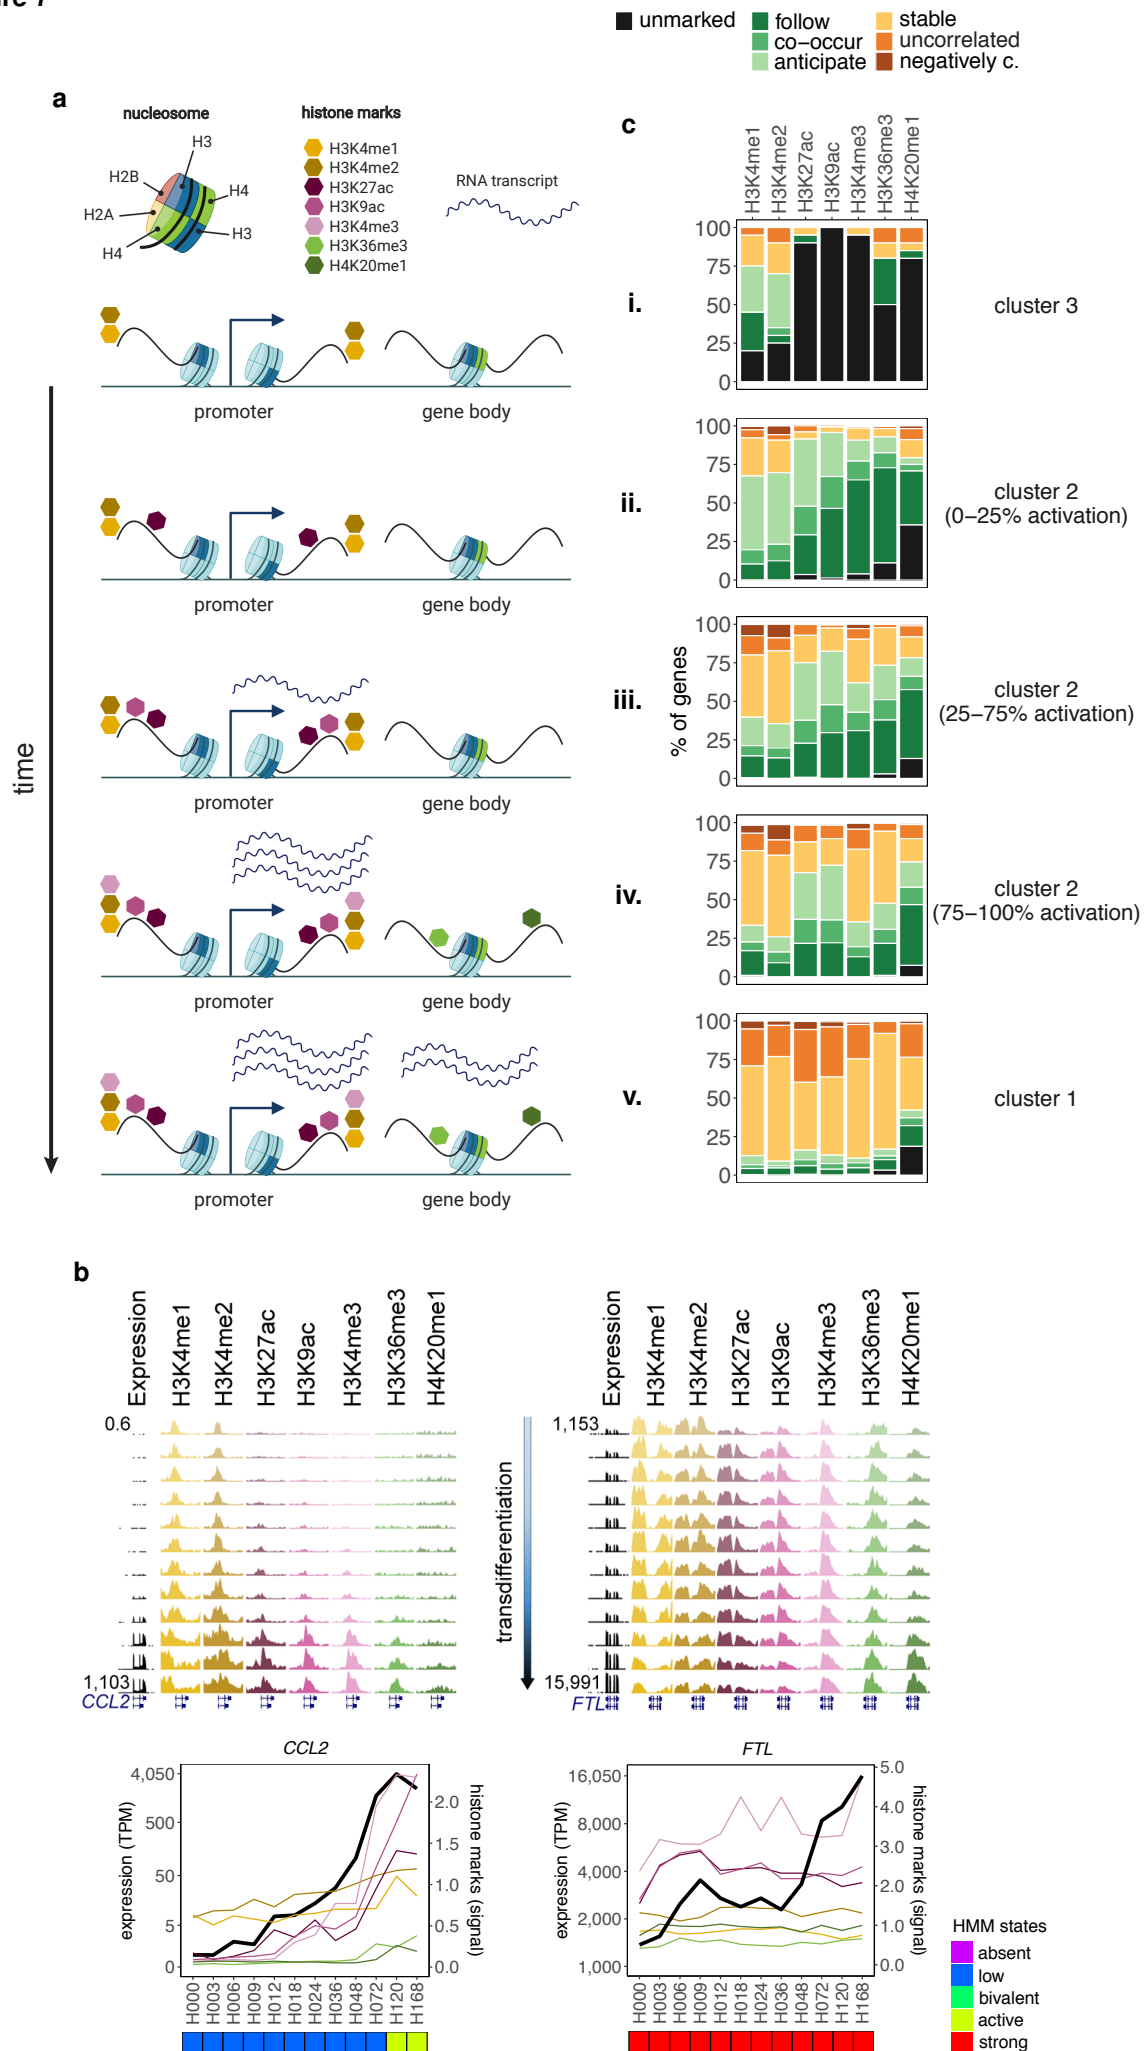

Source: https://www.biorxiv.org/content/10.1101/2020.11.20.391524v1.full.pdf
